# Supplementary material
Source: PubMed Central journal article supplement (PMC6410847)
Supplement: pnas.1821889116.sapp.pdf [file pnas.1821889116.sapp.pdf]

# PNAS

[www.pnas.org](http://www.pnas.org)

Supplementary Information for

*Loss of BOP1 confers resistance to BRAF kinase inhibitors in melanoma by activating MAP kinase pathway*

Romi Gupta, Suresh Bugide, Biao Wang, Michael R. Green, Douglas B. Johnson, and Narendra Wajapeyee

Narendra Wajapeyee  
Michael R. Green

Email: [Narendra.Wajapeyee@yale.edu](mailto:Narendra.Wajapeyee@yale.edu)  
Email: [Michael.Green@umassmed.edu](mailto:Michael.Green@umassmed.edu)

**This PDF file includes:**

Figs. S1 to S8  
Tables S1 to S4

**Fig. S1.**

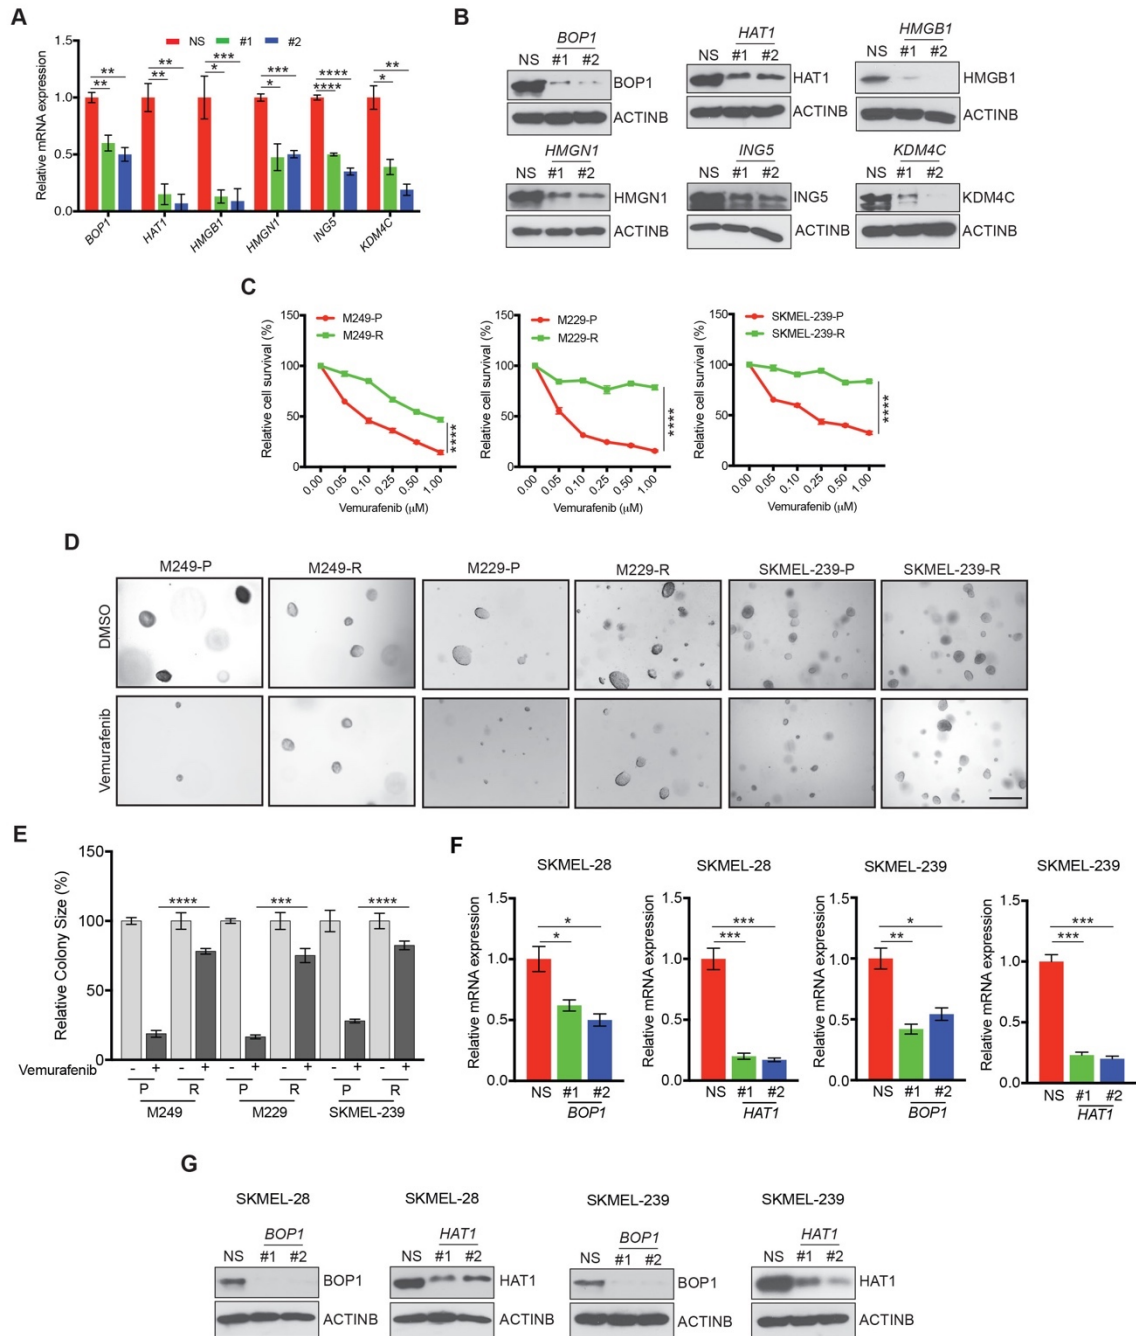

**Fig. S1. Short hairpin RNA (shRNA) targeting efficiencies and vemurafenib sensitivity of parental and BRAF kinase inhibitor-resistant melanoma cells.** (A) Expression of the indicated genes measured by RT-qPCR in A375 cells expressing non-specific (NS) or indicated shRNAs; mRNA expression in shRNA-targeted cells relative to NS shRNA is shown. (B) Levels of indicated proteins measured by immunoblotting in A375 cells expressing NS or shRNAs. (C) Relative cell survival (%) measured by MTT assay of indicated parental (P) or BRAF kinase inhibitor (BRAFi)-resistant (R) melanoma cells treated for 3 days with the indicated concentrations of vemurafenib or

DMSO control. (D) Indicated parental (P) or BRAFi-resistant (R) melanoma cells were treated with vemurafenib (1  $\mu$ M) or DMSO control, and anchorage-independent growth was assessed by soft-agar assay. Representative images of soft-agar colonies under the indicated conditions are shown. Scale bar, 500  $\mu$ M. (E) Relative colony size (%) for the soft-agar data in panel D. (F) Expression of the indicated genes measured by RT-qPCR in SKMEL-28 or SKMEL-239 cells expressing a NS or shRNAs targeting the indicated genes; mRNA expression in shRNA-targeted cells relative to NS shRNA is shown. (G) Levels of indicated proteins measured by immunoblotting in SKMEL-28 or SKMEL-239 cells expressing NS or shRNAs against indicated genes. ACTINB was used as a loading control. Data are presented as the mean  $\pm$  standard error of the mean (SEM). \* $P$ <0.05, \*\* $P$ <0.01, \*\*\* $P$ <0.001, and \*\*\*\* $P$ <0.0001.

**Fig. S2.**

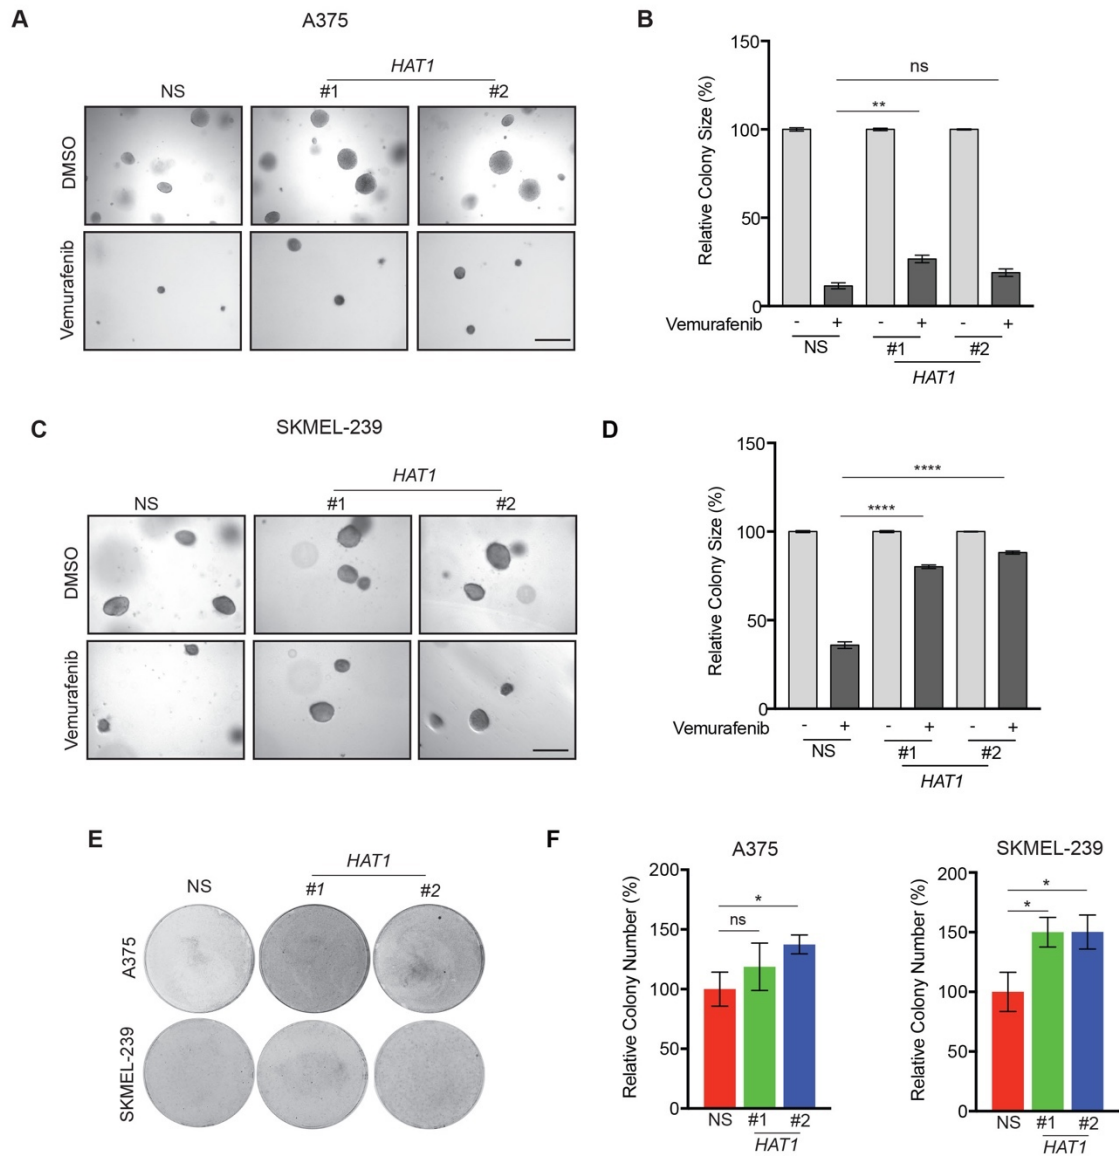

**Fig. S2. *HAT1* knockdown confers vemurafenib resistance in BRAF-mutant melanoma cells.** (A) A375 cells expressing non-specific (NS) or *HAT1* shRNAs were treated with vemurafenib (1  $\mu$ M) or DMSO control, and anchorage-independent growth was measured by soft-agar assay. Representative images of soft-agar colonies under the indicated conditions are shown. Scale bar, 500  $\mu$ M. (B) Relative colony size (%) for the data in panel A. (C) SKMEL-239 cells expressing NS or *HAT1* shRNAs were treated with vemurafenib (1  $\mu$ M) or DMSO control, and anchorage-independent growth was measured by soft-agar assay. Representative images of soft-agar colonies under the indicated conditions are shown. Scale bar, 500  $\mu$ M. (D) Relative colony size (%) for the data in panel C. (E) A375 and SKMEL-239 cells expressing NS or *HAT1* shRNAs were treated with vemurafenib (2  $\mu$ M) and analysed by clonogenic assay. Representative clonogenic assay plates are shown. (F) Relative colony number (%) for the experiments

in panel E. Data are presented as the mean  $\pm$  SEM. ns = not significant.  
\* $P < 0.05$ , \*\* $P < 0.001$ , and \*\*\*\* $P < 0.0001$ .

**Fig. S3.**

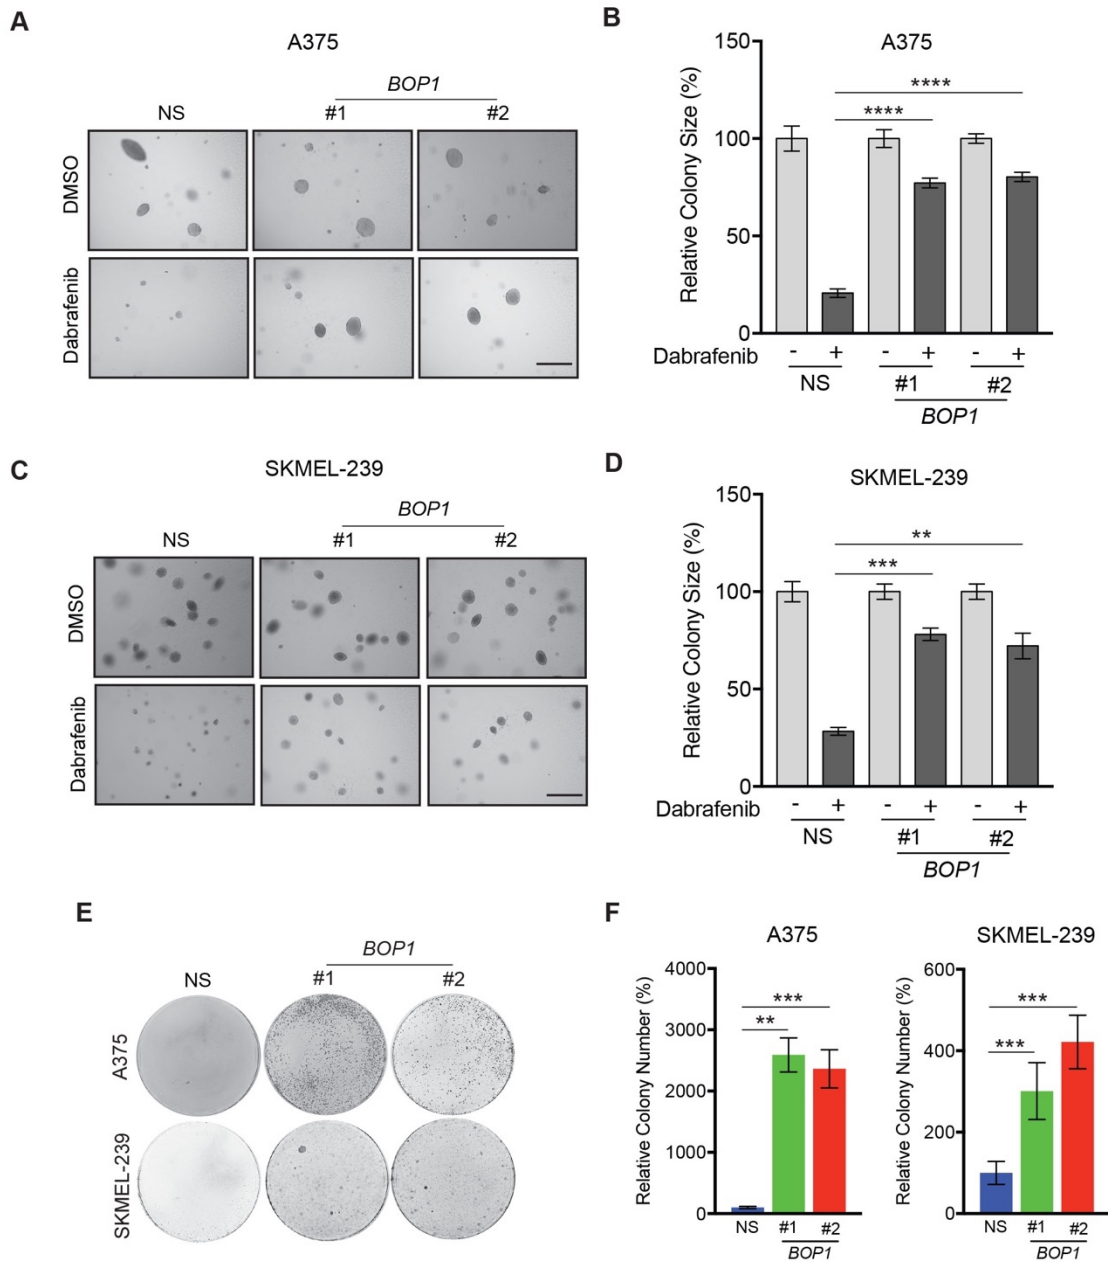

**Fig. S3. Knockdown of *BOP1* confers resistance to the BRAFi, dabrafenib.** (A) A375 cells expressing non-specific (NS) or *BOP1* shRNAs were treated with dabrafenib (50 nM) or DMSO control, and anchorage-independent growth was measured by soft-agar assay. Representative images of soft-agar colonies under the indicated conditions are shown. Scale bar, 500  $\mu$ M. (B) Relative colony size (%) for the data in panel A. (C) SKMEL-239 cells expressing NS or *BOP1* shRNAs were treated with dabrafenib (50 nM) or DMSO control, and anchorage-independent growth was measured by soft-agar assay. Representative images of soft-agar colonies under the indicated conditions are shown. Scale bar, 500  $\mu$ M. (D) Relative colony size (%) for the data in panel C. (E) A375 and SKMEL-239 cells expressing NS or *BOP1* shRNAs were treated with dabrafenib (100 nM) and analysed by clonogenic assay. Representative clonogenic assay plates are

shown. (F) Relative colony number (%) for the data in panel E. Data are presented as the mean  $\pm$  SEM. \*\* $P < 0.01$ , \*\*\* $P < 0.001$ , and \*\*\*\* $P < 0.0001$ .

**Fig. S4.**

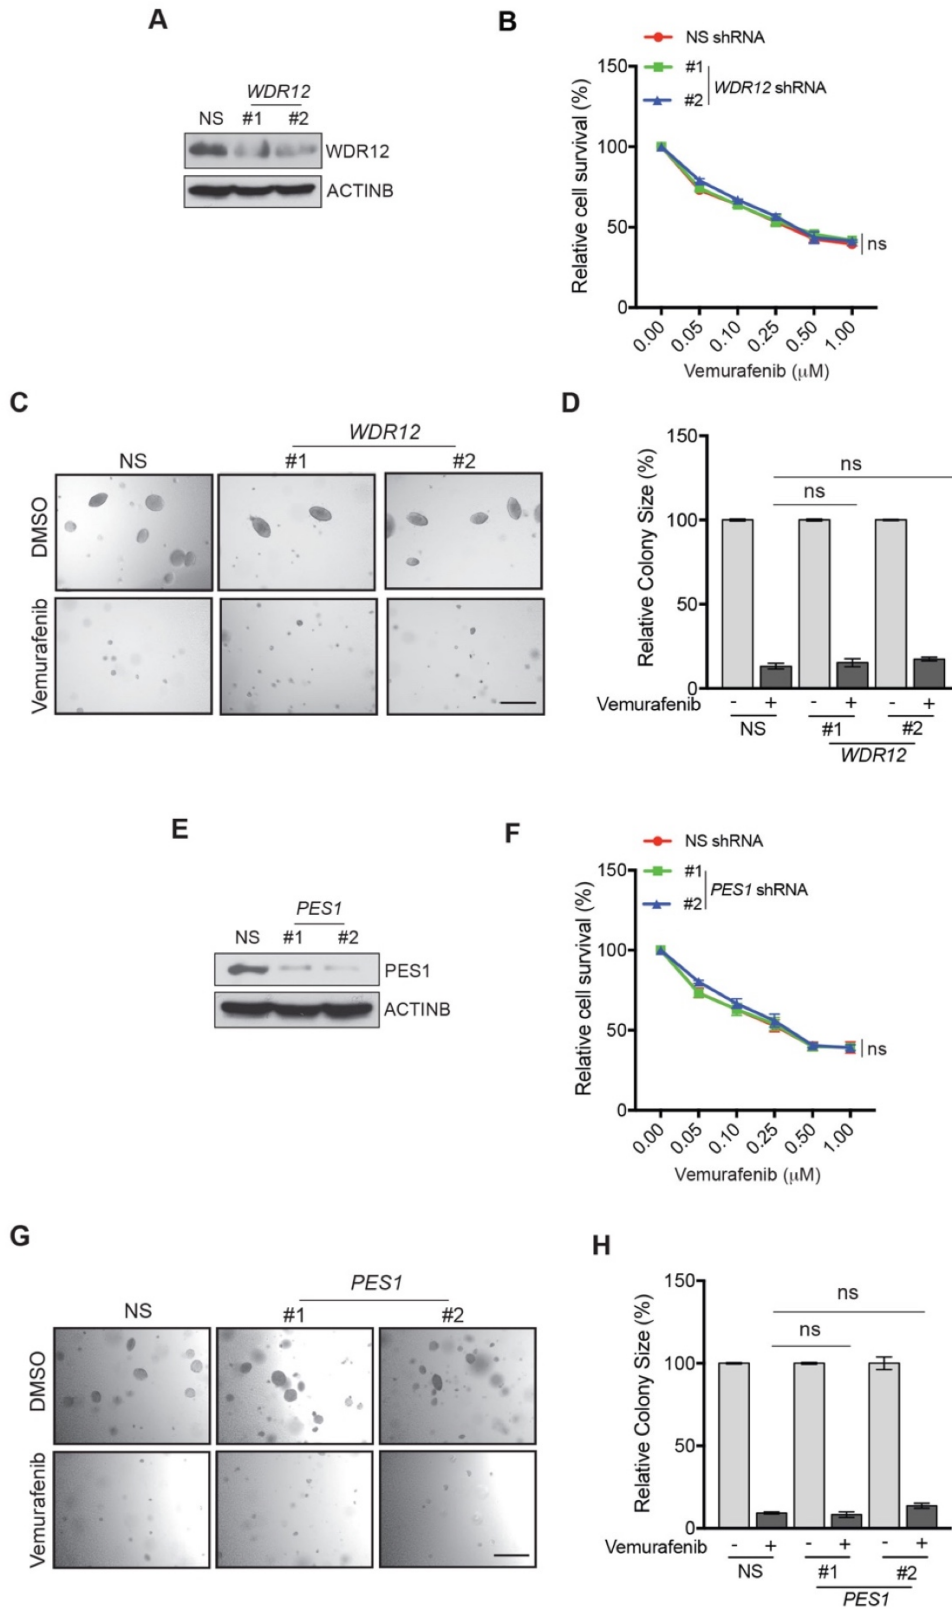



**Fig. S4. Knockdown of the PES1-BOP1-WDR12 complex proteins, WDR12 and PES1, does not confer resistance to BRAF inhibitors.** (A) Levels of indicated proteins measured by immunoblotting in A375 cells expressing non-specific (NS) or *WDR12* shRNAs. (B) Relative cell survival (%) measured by MTT assay in A375 cells expressing NS or *WDR12* shRNAs and treated with indicated concentrations of vemurafenib or DMSO control for 3 days. (C) A375 cells expressing NS or *WDR12* shRNAs were treated with vemurafenib (1  $\mu$ M) or DMSO control, and anchorage-independent growth was measured by soft-agar assay. Representative images of soft-agar colonies under the indicated conditions are shown. Scale bar, 500  $\mu$ M. (D) Relative colony size (%) for the data in panel C. (E) Levels of indicated proteins measured by immunoblotting in A375 cells expressing NS or *PES1* shRNAs. (F) Relative cell survival (%) measured by MTT assay in A375 cells expressing NS or *PES1* shRNAs and treated with indicated concentrations of vemurafenib or DMSO control for 3 days. (G) A375 cells expressing NS or *PES1* shRNAs were treated with vemurafenib (1  $\mu$ M) or DMSO control, and anchorage-independent growth was measured by soft-agar assay. Representative images of soft-agar colonies under the indicated conditions are shown. Scale bar, 500  $\mu$ M. (H) Relative colony size (%) for the data in panel G. Data are presented as the mean  $\pm$  SEM. ns = not significant.

**Fig. S5.** Type or paste caption here. Paste figure above the caption.

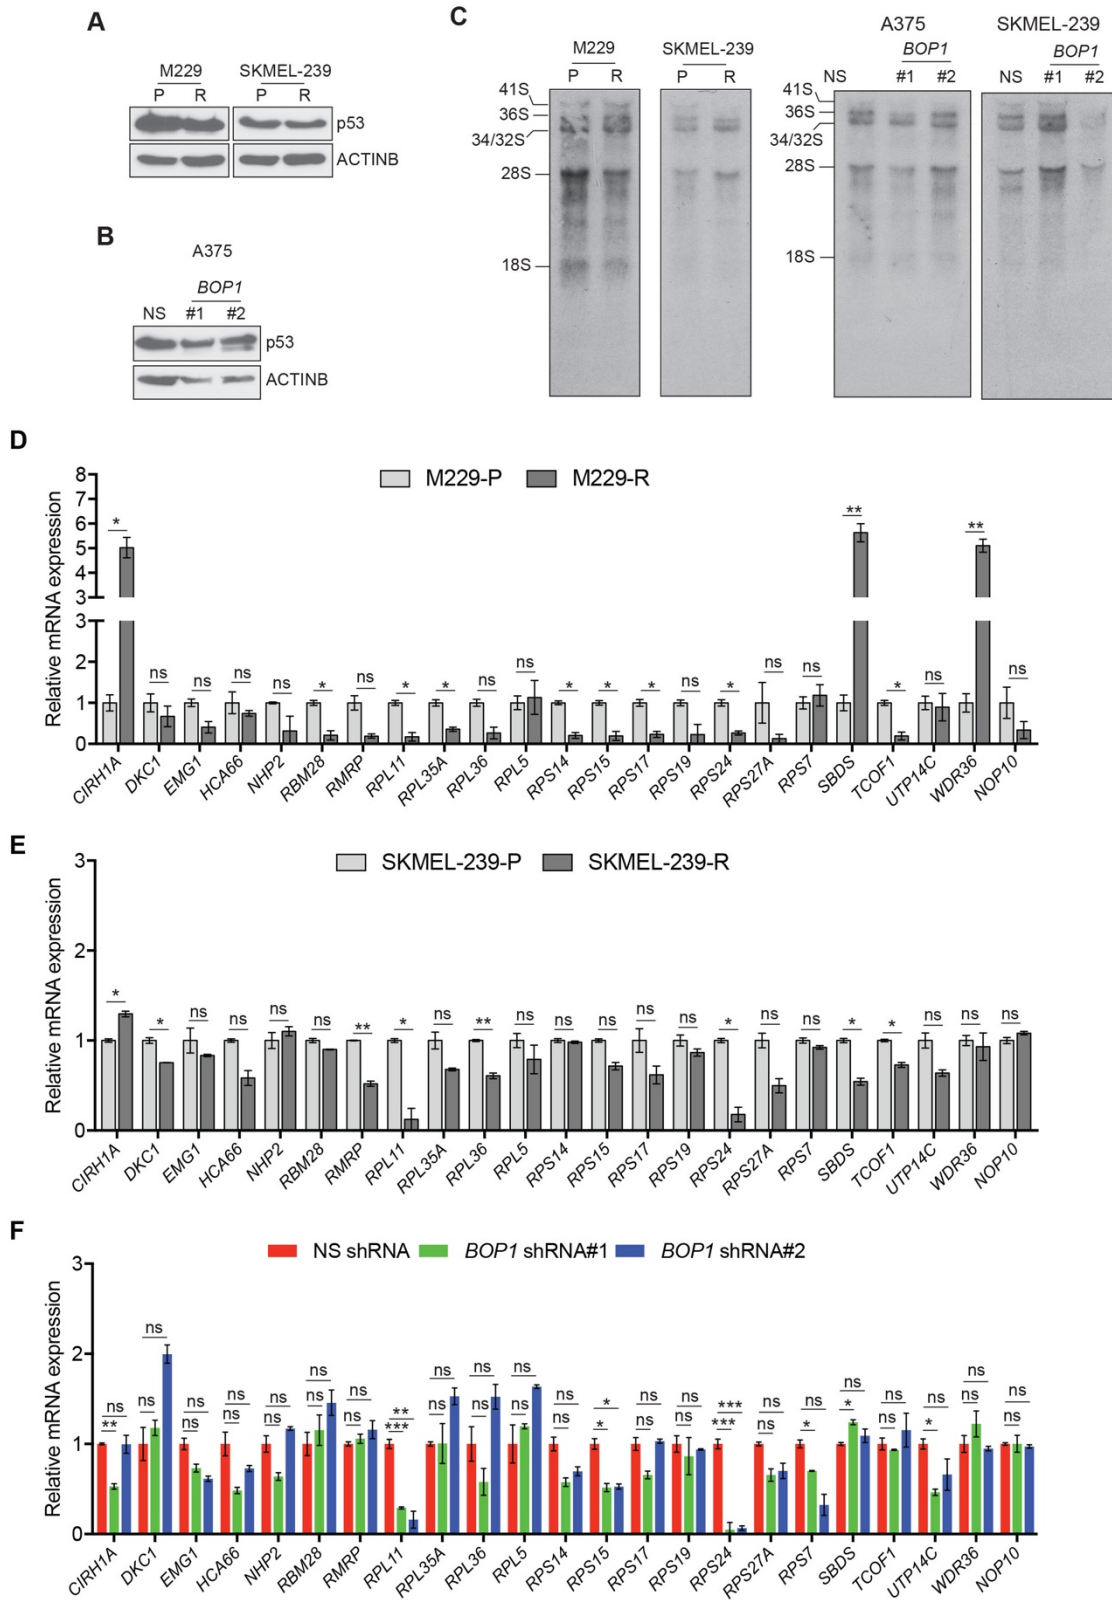

**Fig. S5. Ribosomopathy does not drive BRAFi resistance.** (A) Protein levels of p53 and ACTINB were measured by immunoblotting in the indicated BRAFi-sensitive parental (P) and BRAFi-resistant (R) cell lines. (B) Protein levels of p53 and ACTINB were measured by immunoblotting in A375 cells expressing non-specific (NS) or *BOPI* shRNAs. (C) Ribosomal RNA (rRNA) biogenesis in (Left) indicated BRAFi-sensitive parental (P) and resistant (R) cells and (Right) A375 cells expressing NS or *BOPI* shRNAs, as measured by tritiated uridine ( $H^3$ -U)-based metabolic labelling. (D) Expression of the indicated genes was measured in BRAFi-sensitive parental (P) and BRAFi-resistant (R) M229 cells by RT-qPCR; mRNA expression in R cells relative to P cells is shown. (E) Expression of the indicated genes was measured in BRAFi-sensitive parental (P) and BRAFi-resistant (R) SKMEL-239 cells by RT-qPCR; mRNA expression in R cells relative to P cells is shown. (F) Expression of the indicated genes was measured in A375 cells expressing NS or *BOPI* shRNAs by RT-qPCR; mRNA expression in shRNA-targeted cells relative to NS shRNA is shown. Data are presented as the mean  $\pm$  SEM. ns = not significant, \* $P$ <0.05, \*\* $P$ <0.01 and \*\*\* $P$ <0.001.

**Fig. S6.** Type or paste caption here. Paste figure above the caption.

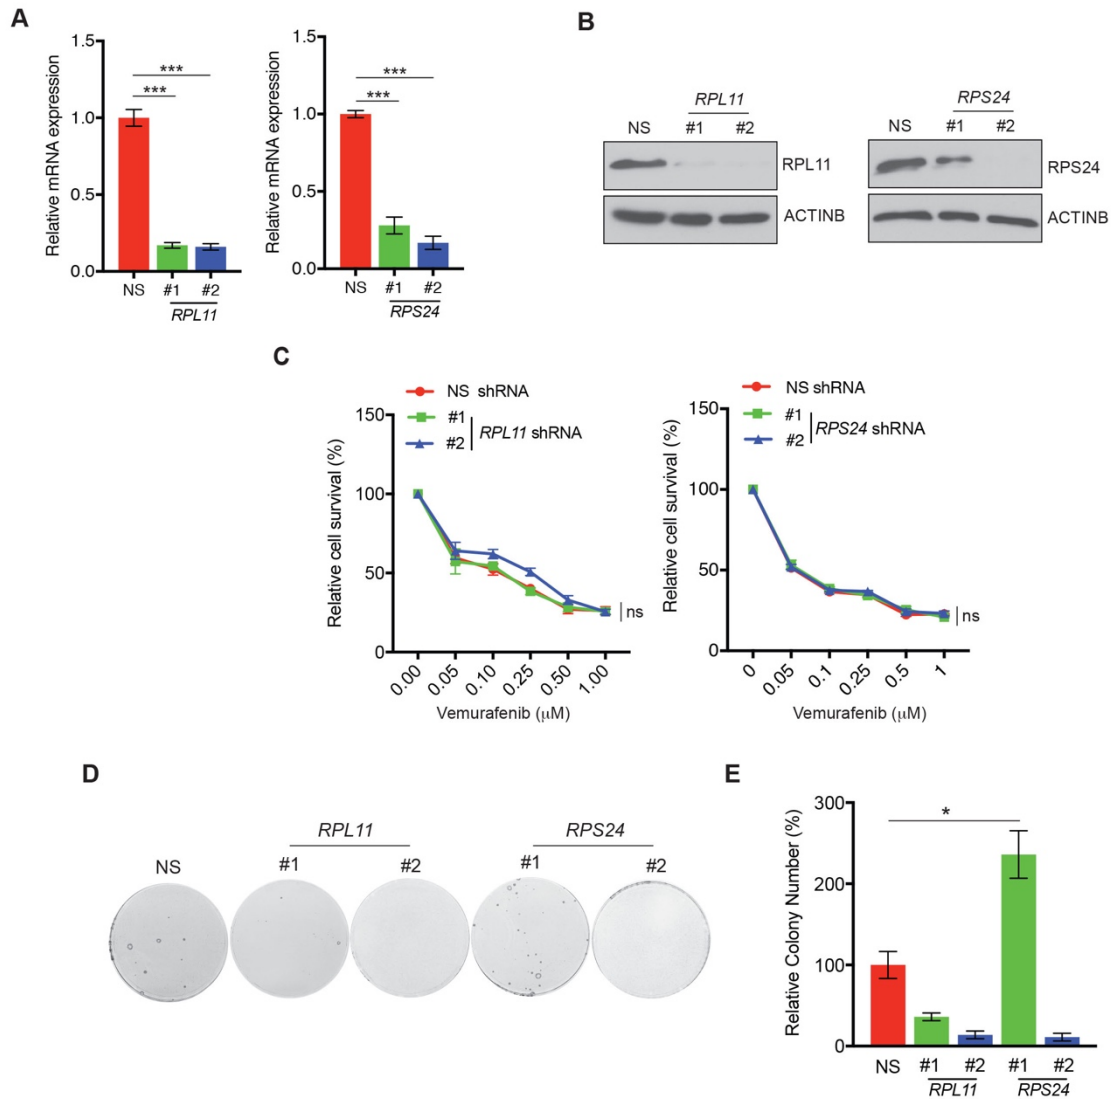

**Fig. S6. Loss of ribosomopathy genes does not confer resistance to BRAF inhibitor.**

(A) Expression of *RPL11* and *RPS24* was measured by RT-qPCR in A375 cells containing non-specific (NS), *RPL11*, or *RPS24* shRNAs, as indicated; mRNA expression in shRNA-targeted cells relative to NS shRNA is shown. (B) Protein levels of RPL11 or RPS24 were measured by immunoblotting in A375 cells containing NS, *RPL11*, or *RPS24* shRNAs, as indicated. ACTINB was used as a loading control. (C) Relative cell survival (%) measured by MTT assay in A375 cells expressing NS, *RPL11*, or *RPS24* shRNAs that were treated with indicated concentrations of vemurafenib for 3 days. (D) A375 cells expressing NS, *RPL11*, or *RPS24* shRNAs were treated with vemurafenib (2  $\mu$ M) or DMSO control and analysed by clonogenic assay. Representative clonogenic assay plates are shown. (E) Relative colony numbers (%) for the experiments in panel D. Data are presented as the mean  $\pm$  SEM. ns = not significant. \* $P$ <0.05 and \*\*\* $P$ <0.001.

**Fig. S7.**

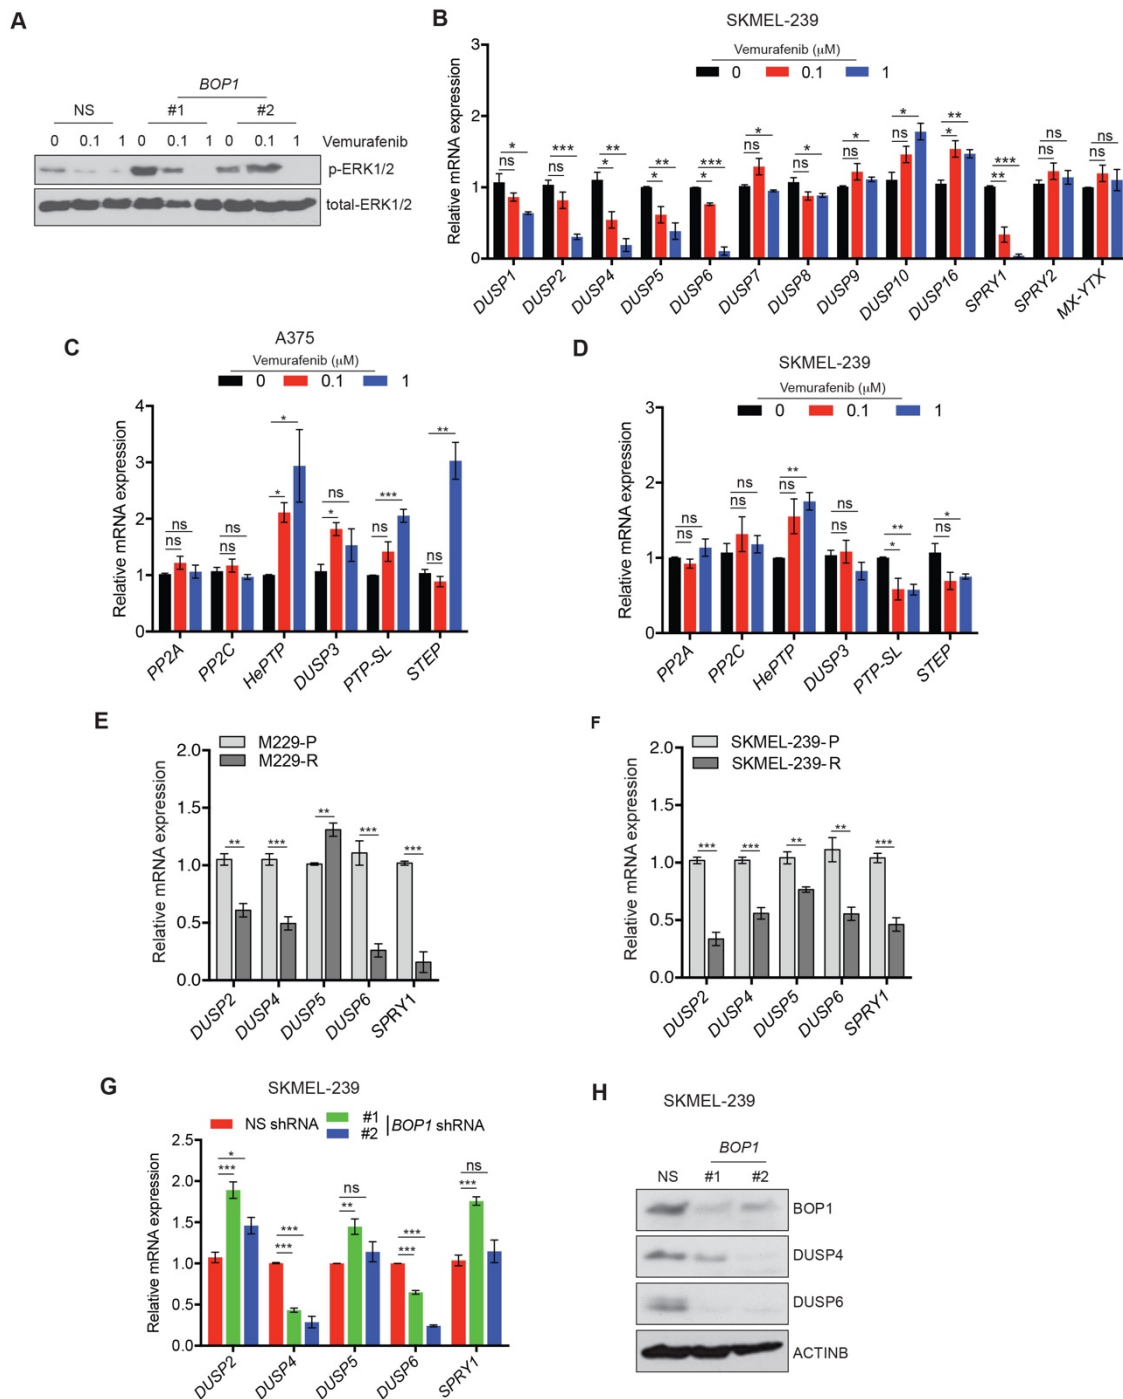

**Fig. S7. Loss of BOP1 enhances the MAP kinase pathway by regulating *DUSP4* and *DUSP6*.** (A) Levels of indicated proteins were measured by immunoblotting in SKMEL-239 cells expressing non-specific (NS) or *BOP1* shRNAs and treated with indicated concentrations of vemurafenib (0.1 or 1.0 μM) or DMSO for 3 h. (B) Levels of indicated phosphatases were measured by RT-qPCR in SKMEL-239 cells treated with vemurafenib (0.1 or 1 μM) or DMSO control for 24 h. Relative mRNA expression of indicated phosphatases in vemurafenib-treated relative to DMSO-treated cells is shown. (C) Levels

of indicated phosphatases were measured by RT-qPCR in A375 cells treated with vemurafenib (0.1 or 1  $\mu$ M) or DMSO control for 24 h. Relative mRNA expression of indicated phosphatases in vemurafenib-treated relative to DMSO-treated cells is shown. (D) Levels of indicated phosphatases were measured by RT-qPCR in SKMEL-239 cells treated with vemurafenib (0.1 or 1  $\mu$ M) or DMSO control for 24 h. Relative mRNA expression of indicated phosphatases in vemurafenib-treated relative to DMSO-treated cells is shown. (E) Levels of indicated phosphatases were measured by RT-qPCR in M229 parent (P) or BRAFi-resistant M229 (M229-R) cells. Relative mRNA expression of indicated phosphatases in M229-R relative to P cells is shown. (F) Levels of indicated phosphatases were measured by RT-qPCR in SKMEL-239 parent (P) or BRAFi-resistant SKMEL-239 (SKMEL-239-R) cells. Relative mRNA expression of indicated phosphatases in SKMEL-239-R relative to P cells is shown. (G) Levels of indicated phosphatases were measured by RT-qPCR in SKMEL-239 cells expressing NS or *BOP1* shRNAs. Relative mRNA expression in shRNA-targeted cells relative to NS shRNA is shown. (H) Levels of indicated proteins were measured by immunoblotting in SKMEL-239 cells expressing NS or *BOP1* shRNAs. Data are presented as the mean  $\pm$  SEM. ns = not significant. \* $P$ <0.05, \*\* $P$ <0.01, and \*\*\* $P$ <0.001.

**Fig. S8.**

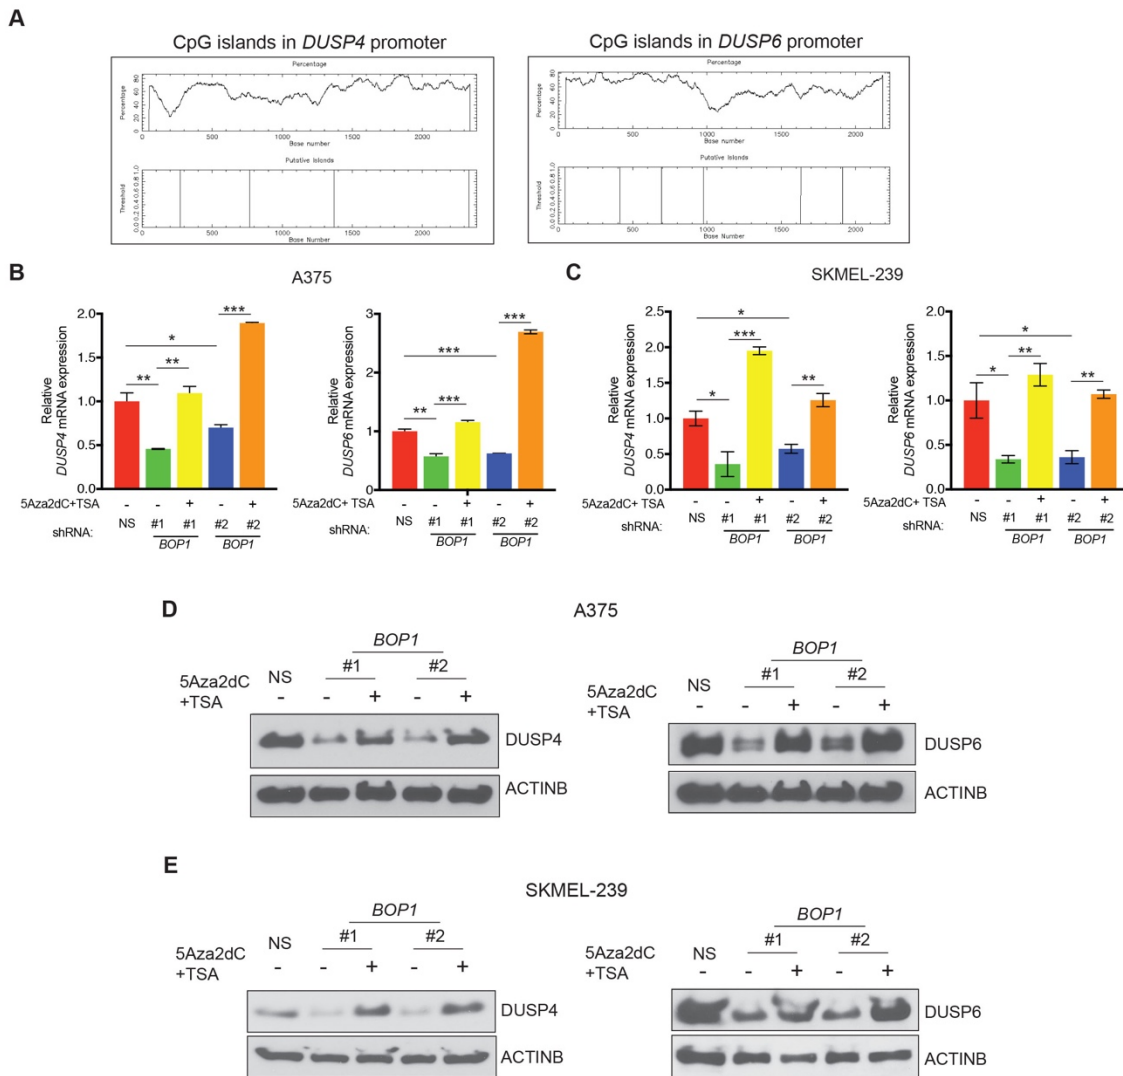

**Fig. S8. BOP1 loss results in transcriptional silencing of *DUSP4* and *DUSP6*.** (A) The European Bioinformatic Institute (EBI) CpG plot analysis of the promoter sequences for *DUSP4* and *DUSP6* reveal the presence of CpG islands. (B) Expression of *DUSP4* and *DUSP6* was measured by RT-qPCR in A375 cells containing non-specific (NS) or *BOP1* shRNAs, treated with 5Aza2dC (5  $\mu$ M; 72 h) and TSA (1  $\mu$ M; 12 h). Relative mRNA expression in shRNA-targeted cells relative to NS shRNA is shown. (C) Expression of *DUSP4* and *DUSP6* was measured by RT-qPCR in SKMEL-239 cells expressing NS or *BOP1* shRNAs, treated with 5Aza2dC (5  $\mu$ M; 72 h) and TSA (1  $\mu$ M; 12 h). Relative mRNA expression in shRNA-targeted cells relative to NS shRNA is shown. (D) Levels of DUSP4 and DUSP6 proteins were measured by immunoblotting in A375 cells expressing NS or *BOP1* shRNAs, treated with 5Aza2dC (5  $\mu$ M, 72 h) and TSA (1  $\mu$ M, 12 h). ACTINB was used as a loading control. (E) Levels of DUSP4 and DUSP6 proteins were measured by immunoblotting in SKMEL-239 cells expressing NS or *BOP1* shRNAs, treated with 5Aza2dC (5  $\mu$ M, 72 h) and TSA (1  $\mu$ M, 12 h). ACTINB was used

as a loading control. Data are presented as the mean  $\pm$  SEM. \* $P$ <0.05, \*\* $P$ <0.01, and \*\*\* $P$ <0.001.



**Table S1.** List of genes targeted by the human epigenome-wide shRNA library and shRNA IDs.

| S.No. | Gene Name     | shRNA IDs                                                                              |
|-------|---------------|----------------------------------------------------------------------------------------|
| 1     | 2410016006Rik | TRCN0000180487                                                                         |
| 2     | ACTL6A        | TRCN0000072273<br>TRCN0000072274<br>TRCN0000072275<br>TRCN0000072277<br>TRCN0000072276 |
| 3     | ACTL6B        | TRCN0000116767<br>TRCN0000116768<br>TRCN0000116769<br>TRCN0000116770<br>TRCN0000116771 |
| 4     | AIRE          | TRCN0000018890<br>TRCN0000018891<br>TRCN0000018892<br>TRCN0000018893<br>TRCN0000018894 |
| 5     | ALKBH2        | TRCN0000064678<br>TRCN0000064679<br>TRCN0000064680<br>TRCN0000064681<br>TRCN0000064682 |
| 6     | AOF1/KDM1B    | TRCN0000046073<br>TRCN0000046074<br>TRCN0000046076<br>TRCN0000046075<br>TRCN0000046077 |
| 7     | AOF2          | TRCN0000046068<br>TRCN0000046069<br>TRCN0000046070<br>TRCN0000046071<br>TRCN0000046072 |
| 8     | APITD1        | TRCN0000038878<br>TRCN0000038874<br>TRCN0000191787                                     |

|    |        |                                                                                                                            |
|----|--------|----------------------------------------------------------------------------------------------------------------------------|
| 9  | ARID1A | TRCN0000059089<br>TRCN0000059090<br>TRCN0000059092<br>TRCN0000059088<br>TRCN0000059091<br>TRCN0000071394<br>TRCN0000071397 |
| 10 | ARID3C | TRCN0000201971                                                                                                             |
| 11 | ARID4A | TRCN0000014595<br>TRCN0000014593<br>TRCN0000014594<br>TRCN0000014596<br>TRCN0000014597                                     |
| 12 | ASF1A  | TRCN0000074268<br>TRCN0000074269<br>TRCN0000074271<br>TRCN0000074272<br>TRCN0000074270                                     |
| 13 | ASF1B  | TRCN0000074225<br>TRCN0000074226<br>TRCN0000074227<br>TRCN0000108962                                                       |
| 14 | ASH1L  | TRCN0000016168<br>TRCN0000016169<br>TRCN0000016170<br>TRCN0000016171<br>TRCN0000016172                                     |
| 15 | ASH2L  | TRCN0000019274<br>TRCN0000019275<br>TRCN0000019276<br>TRCN0000019277<br>TRCN0000019278                                     |
| 16 | ASXL1  | TRCN0000135296<br>TRCN0000138572<br>TRCN0000133699<br>TRCN0000134690<br>TRCN0000135579                                     |
| 17 | ATM    | TRCN0000010299<br>TRCN0000038654<br>TRCN0000039948                                                                         |

|    |       |                                                                                                                                                                                  |
|----|-------|----------------------------------------------------------------------------------------------------------------------------------------------------------------------------------|
| 18 | ATR   | TRCN0000039614<br>TRCN0000007749<br>TRCN0000023912<br>TRCN0000023913                                                                                                             |
| 19 | ATRX  | TRCN0000013588<br>TRCN0000013589<br>TRCN0000013590<br>TRCN0000013591<br>TRCN0000013592                                                                                           |
| 20 | AURKB | TRCN0000000776<br>TRCN0000010547<br>TRCN0000000777<br>TRCN0000000778<br>TRCN0000000779                                                                                           |
| 21 | BAZ1A | TRCN0000034279<br>TRCN0000034280<br>TRCN0000034281<br>TRCN0000034282<br>TRCN0000034283                                                                                           |
| 22 | BAZ1B | TRCN0000013339<br>TRCN0000013342<br>TRCN0000013340<br>TRCN0000013341<br>TRCN0000013338<br>TRCN0000108939                                                                         |
| 23 | BAZ2A | TRCN0000015568<br>TRCN0000015569<br>TRCN0000015571<br>TRCN0000015572<br>TRCN0000015570                                                                                           |
| 24 | BAZ2B | TRCN0000019928<br>TRCN0000019924<br>TRCN0000019926<br>TRCN0000019925<br>TRCN0000019927<br>TRCN0000116909<br>TRCN0000116910<br>TRCN0000116908<br>TRCN0000200866<br>TRCN0000191572 |

|    |      |                                                                                        |
|----|------|----------------------------------------------------------------------------------------|
|    |      | TRCN0000201016                                                                         |
| 25 | BCOR | TRCN0000033459<br>TRCN0000033460<br>TRCN0000033461<br>TRCN0000033462<br>TRCN0000033463 |
| 26 | BMI1 | TRCN0000020154<br>TRCN0000020155<br>TRCN0000020156<br>TRCN0000020157<br>TRCN0000020158 |
| 27 | BOP1 | TRCN0000078068<br>TRCN0000078069<br>TRCN0000078070<br>TRCN0000078071<br>TRCN0000078072 |
| 28 | BPTF | TRCN0000016818<br>TRCN0000016819<br>TRCN0000016820<br>TRCN0000016821<br>TRCN0000016822 |
| 29 | BRAF | TRCN0000006289<br>TRCN0000006290<br>TRCN0000006291<br>TRCN0000006292<br>TRCN0000006293 |
| 30 | BRD1 | TRCN0000019284<br>TRCN0000019285<br>TRCN0000019286<br>TRCN0000019287<br>TRCN0000019288 |
| 31 | BRD2 | TRCN0000006308<br>TRCN0000006309<br>TRCN0000006310<br>TRCN0000006311<br>TRCN0000006312 |
| 32 | BRD3 | TRCN0000021374<br>TRCN0000021375<br>TRCN0000021376<br>TRCN0000021377                   |

|    |       |                                                                                                                                                                |
|----|-------|----------------------------------------------------------------------------------------------------------------------------------------------------------------|
|    |       | TRCN0000021378                                                                                                                                                 |
| 33 | BRD4  | TRCN0000021424<br>TRCN0000021425<br>TRCN0000021426<br>TRCN0000021427<br>TRCN0000021428                                                                         |
| 34 | BRD7  | TRCN0000151378<br>TRCN0000151543<br>TRCN0000154102                                                                                                             |
| 35 | BRD8  | TRCN0000019379<br>TRCN0000019380<br>TRCN0000019381<br>TRCN0000019382<br>TRCN0000019383<br>TRCN0000096646                                                       |
| 36 | BRD9  | TRCN0000127634<br>TRCN0000127780<br>TRCN0000128333<br>TRCN0000128610<br>TRCN0000131081                                                                         |
| 37 | BRDT  | TRCN0000006303<br>TRCN0000006304<br>TRCN0000006305<br>TRCN0000006306<br>TRCN0000006307                                                                         |
| 38 | BRPF1 | TRCN0000021909<br>TRCN0000021912<br>TRCN0000021913<br>TRCN0000019287<br>TRCN0000021910<br>TRCN0000019286<br>TRCN0000019288<br>TRCN0000019285<br>TRCN0000019284 |
| 39 | BRPF3 | TRCN0000021101<br>TRCN0000021099<br>TRCN0000021102<br>TRCN0000021100<br>TRCN0000021103                                                                         |
| 40 | BRWD1 | TRCN0000062663                                                                                                                                                 |

|    |                |                                                                                        |
|----|----------------|----------------------------------------------------------------------------------------|
|    |                | TRCN0000062667<br>TRCN0000062664<br>TRCN0000062665<br>TRCN0000062666<br>TRCN0000084534 |
| 41 | BRWD3          | TRCN0000160865<br>TRCN0000159352<br>TRCN0000159686<br>TRCN0000136866<br>TRCN0000162485 |
| 42 | BTAF1          | TRCN0000013345<br>TRCN0000013347<br>TRCN0000013343<br>TRCN0000013346<br>TRCN0000013344 |
| 43 | C1ORF149/MEAF6 | TRCN0000130900<br>TRCN0000131146<br>TRCN0000131218<br>TRCN0000127694<br>TRCN0000128122 |
| 44 | C20orf20/MRGBP | TRCN0000158734<br>TRCN0000159338<br>TRCN0000159786<br>TRCN0000159916<br>TRCN0000159917 |
| 45 | CARM1          | TRCN0000007167<br>TRCN0000011071<br>TRCN0000007168<br>TRCN0000007169                   |
| 46 | CBX1           | TRCN0000062223<br>TRCN0000062224<br>TRCN0000062225<br>TRCN0000062227                   |
| 47 | CBX2           | TRCN0000020324<br>TRCN0000020325<br>TRCN0000020326<br>TRCN0000020327<br>TRCN0000020328 |
| 48 | CBX3           | TRCN0000021914<br>TRCN0000021915                                                       |

|    |       |                                                                                                                            |
|----|-------|----------------------------------------------------------------------------------------------------------------------------|
|    |       | TRCN0000021916<br>TRCN0000021917<br>TRCN0000021918                                                                         |
| 49 | CBX4  | TRCN0000010848<br>TRCN0000010847<br>TRCN0000010847<br>TRCN0000010848<br>TRCN0000004075<br>TRCN0000004076<br>TRCN0000004077 |
| 50 | CBX5  | TRCN0000062238<br>TRCN0000062239<br>TRCN0000062240<br>TRCN0000062241                                                       |
| 51 | CBX6  | TRCN0000019064<br>TRCN0000019065<br>TRCN0000019066<br>TRCN0000019067<br>TRCN0000019068<br>TRCN0000019066<br>TRCN0000019064 |
| 52 | CBX7  | TRCN0000019144<br>TRCN0000019145<br>TRCN0000019146<br>TRCN0000019147<br>TRCN0000019148                                     |
| 53 | CBX8  | TRCN0000021894<br>TRCN0000021895<br>TRCN0000021896<br>TRCN0000021897<br>TRCN0000021898                                     |
| 54 | CDYL  | TRCN0000127490<br>TRCN0000128090<br>TRCN0000129081<br>TRCN0000130319<br>TRCN0000130348                                     |
| 55 | CDYL2 | TRCN0000130613<br>TRCN0000130980<br>TRCN0000128562<br>TRCN0000129793                                                       |

|    |        |                                                                                        |
|----|--------|----------------------------------------------------------------------------------------|
|    |        | TRCN0000130929                                                                         |
| 56 | CHAF1A | TRCN0000074273<br>TRCN0000074274<br>TRCN0000074275<br>TRCN0000074276<br>TRCN0000074277 |
| 57 | CHAF1B | TRCN0000074278<br>TRCN0000074279<br>TRCN0000074280<br>TRCN0000074281<br>TRCN0000074282 |
| 58 | CHD1   | TRCN0000021309<br>TRCN0000021310<br>TRCN0000021311<br>TRCN0000021312<br>TRCN0000021313 |
| 59 | CHD1L  | TRCN0000013468<br>TRCN0000013469<br>TRCN0000013470<br>TRCN0000013471<br>TRCN0000013472 |
| 60 | CHD2   | TRCN0000021334<br>TRCN0000021335<br>TRCN0000021336<br>TRCN0000021337<br>TRCN0000021338 |
| 61 | CHD3   | TRCN0000107970<br>TRCN0000107971<br>TRCN0000107972<br>TRCN0000107973<br>TRCN0000107974 |
| 62 | CHD4   | TRCN0000021359<br>TRCN0000021360<br>TRCN0000021361<br>TRCN0000021362<br>TRCN0000021363 |
| 63 | CHD5   | TRCN0000021794<br>TRCN0000021795<br>TRCN0000021796<br>TRCN0000021797                   |



|    |        |                                                                                                                                              |
|----|--------|----------------------------------------------------------------------------------------------------------------------------------------------|
|    |        | TRCN0000021798<br>TRCN0000133708<br>TRCN0000134601<br>TRCN0000135744<br>TRCN0000136457<br>TRCN0000138817                                     |
| 64 | CHD6   | TRCN0000107415<br>TRCN0000107416<br>TRCN0000107417<br>TRCN0000107418<br>TRCN0000107419                                                       |
| 65 | CHD7   | TRCN0000016408<br>TRCN0000016409<br>TRCN0000016410<br>TRCN0000016411<br>TRCN0000016412                                                       |
| 66 | CHD8   | TRCN0000016508<br>TRCN0000016509<br>TRCN0000016510<br>TRCN0000016511<br>TRCN0000016512                                                       |
| 67 | CHD9   | TRCN0000108085<br>TRCN0000108086<br>TRCN0000108087<br>TRCN0000108088<br>TRCN0000108089                                                       |
| 68 | CHRAC1 | TRCN0000017398<br>TRCN0000017399<br>TRCN0000017400<br>TRCN0000017401<br>TRCN0000017402                                                       |
| 69 | CITED2 | TRCN0000015653<br>TRCN0000015654<br>TRCN0000015656<br>TRCN0000015657<br>TRCN0000015655<br>TRCN0000055104<br>TRCN0000055105<br>TRCN0000055107 |
| 70 | CLOCK  | TRCN0000018974                                                                                                                               |

|    |        |                                                                                                                                              |
|----|--------|----------------------------------------------------------------------------------------------------------------------------------------------|
|    |        | TRCN0000018975<br>TRCN0000018976<br>TRCN0000018977<br>TRCN0000018978                                                                         |
| 71 | CREBBP | TRCN0000006485<br>TRCN0000011027<br>TRCN0000006486<br>TRCN0000006487<br>TRCN0000006488                                                       |
| 72 | CTCF   | TRCN0000015653<br>TRCN0000015654<br>TRCN0000015656<br>TRCN0000015657<br>TRCN0000015655<br>TRCN0000055104<br>TRCN0000055105<br>TRCN0000055107 |
| 73 | CTNNB1 | TRCN0000003846<br>TRCN0000003843<br>TRCN0000003845<br>TRCN0000010824<br>TRCN0000003844                                                       |
| 74 | CTSL1  | TRCN0000003674<br>TRCN0000003675<br>TRCN0000003676<br>TRCN0000003677<br>TRCN0000003678                                                       |
| 75 | CXXC1  | TRCN0000155700<br>TRCN0000155371<br>TRCN0000152721<br>TRCN0000155409<br>TRCN0000156075                                                       |
| 76 | DMAP1  | TRCN0000021744<br>TRCN0000021745<br>TRCN0000021746<br>TRCN0000021747<br>TRCN0000021748                                                       |
| 77 | DNMT1  | TRCN0000021889<br>TRCN0000021890<br>TRCN0000021891                                                                                           |

|    |        |                                                                                                                            |
|----|--------|----------------------------------------------------------------------------------------------------------------------------|
|    |        | TRCN0000021892<br>TRCN0000021893                                                                                           |
| 78 | DNMT3A | TRCN0000035754<br>TRCN0000035755<br>TRCN0000035756<br>TRCN0000035757<br>TRCN0000035758                                     |
| 79 | DNMT3B | TRCN0000035687<br>TRCN0000035685<br>TRCN0000035684<br>TRCN0000035688<br>TRCN0000035686                                     |
| 80 | DNMT3L | TRCN0000019682<br>TRCN0000019683<br>TRCN0000019680<br>TRCN0000019679<br>TRCN0000019681                                     |
| 81 | DOT1L  | TRCN0000020211<br>TRCN0000020212<br>TRCN0000020209<br>TRCN0000020210<br>TRCN0000020211<br>TRCN0000020212<br>TRCN0000020213 |
| 82 | DPF1   | TRCN0000013168<br>TRCN0000013169<br>TRCN0000013170<br>TRCN0000013171<br>TRCN0000013172                                     |
| 83 | DPF2   | TRCN0000014743<br>TRCN0000014744<br>TRCN0000014745<br>TRCN0000014746<br>TRCN0000014747                                     |
| 84 | DPF3   | TRCN0000013153<br>TRCN0000013154<br>TRCN0000013155<br>TRCN0000013156<br>TRCN0000013157<br>TRCN0000086345                   |

|    |       |                                                                                                                            |
|----|-------|----------------------------------------------------------------------------------------------------------------------------|
| 85 | DZIP3 | TRCN0000034244<br>TRCN0000034246<br>TRCN0000034245<br>TRCN0000034247<br>TRCN0000034248                                     |
| 86 | EDF1  | TRCN0000013273<br>TRCN0000013274<br>TRCN0000013275<br>TRCN0000013276<br>TRCN0000013277                                     |
| 87 | EED   | TRCN0000021204<br>TRCN0000021205<br>TRCN0000021206<br>TRCN0000021207<br>TRCN0000021208<br>TRCN0000095721<br>TRCN0000095723 |
| 88 | EHMT1 | TRCN0000036054<br>TRCN0000036055<br>TRCN0000036056<br>TRCN0000036057<br>TRCN0000036058                                     |
| 89 | EHMT2 | TRCN0000115667<br>TRCN0000115668<br>TRCN0000115669<br>TRCN0000115670<br>TRCN0000115671                                     |
| 90 | ELP3  | TRCN0000001277<br>TRCN0000001278<br>TRCN0000001279<br>TRCN0000001280<br>TRCN0000001281                                     |
| 91 | EP300 | TRCN0000039883<br>TRCN0000039884<br>TRCN0000039885<br>TRCN0000039886<br>TRCN0000039887                                     |
| 92 | EP400 | TRCN0000148232<br>TRCN0000149814<br>TRCN0000148814                                                                         |

|    |        |                                                                                                          |
|----|--------|----------------------------------------------------------------------------------------------------------|
|    |        | TRCN0000149151<br>TRCN0000050261<br>TRCN0000050258<br>TRCN0000050260<br>TRCN0000050262                   |
| 93 | EPC1   | TRCN0000073263<br>TRCN0000073264<br>TRCN0000073265<br>TRCN0000073266<br>TRCN0000073267<br>TRCN0000108956 |
| 94 | EPC2   | TRCN0000062733<br>TRCN0000062734<br>TRCN0000062735<br>TRCN0000062736<br>TRCN0000062737                   |
| 95 | EVI1   | TRCN0000002528<br>TRCN0000002529<br>TRCN0000002530<br>TRCN0000002531<br>TRCN0000002532                   |
| 96 | EZH1   | TRCN0000002439<br>TRCN0000010708<br>TRCN0000002440<br>TRCN0000002441<br>TRCN0000002442                   |
| 97 | EZH2   | TRCN0000040073<br>TRCN0000040074<br>TRCN0000040075<br>TRCN0000040076<br>TRCN0000040077                   |
| 98 | FBXL10 | TRCN0000118437<br>TRCN0000118438<br>TRCN0000118439<br>TRCN0000118440<br>TRCN0000118441                   |
| 99 | FBXL11 | TRCN0000021999<br>TRCN0000022000<br>TRCN0000022001<br>TRCN0000022002                                     |

|     |              |                                                                                                                                                                                  |
|-----|--------------|----------------------------------------------------------------------------------------------------------------------------------------------------------------------------------|
|     |              | TRCN0000022003                                                                                                                                                                   |
| 100 | FBXL19       | TRCN0000062333<br>TRCN0000062334<br>TRCN0000062335<br>TRCN0000062336<br>TRCN0000062337                                                                                           |
| 101 | FKBP1A       | TRCN0000005949<br>TRCN0000005950<br>TRCN0000005951<br>TRCN0000005952<br>TRCN0000005953                                                                                           |
| 102 | FKBP5        | TRCN0000000234<br>TRCN0000000235<br>TRCN0000000236<br>TRCN0000000237<br>TRCN0000000238                                                                                           |
| 103 | GCN5L2/KAT2A | TRCN0000038879<br>TRCN0000038880<br>TRCN0000038881<br>TRCN0000038882<br>TRCN0000038883                                                                                           |
| 104 | GON4L        | TRCN0000133702<br>TRCN0000134438<br>TRCN0000133891                                                                                                                               |
| 105 | GTF3C4       | TRCN0000013398<br>TRCN0000013399<br>TRCN0000013400<br>TRCN0000013401<br>TRCN0000013402                                                                                           |
| 106 | H2AFB1       | TRCN0000106825<br>TRCN0000106827<br>TRCN0000106829<br>TRCN0000106895<br>TRCN0000106896<br>TRCN0000106898<br>TRCN0000106899<br>TRCN0000106826<br>TRCN0000106828<br>TRCN0000106897 |
| 107 | H2AFJ        | TRCN0000106746                                                                                                                                                                   |

|     |        |                                                                                                                            |
|-----|--------|----------------------------------------------------------------------------------------------------------------------------|
|     |        | TRCN0000106749<br>RCN0000106745<br>TRCN0000106747<br>TRCN0000106748                                                        |
| 108 | H2AFV  | TRCN0000106835<br>TRCN0000106837<br>TRCN0000106838<br>TRCN0000106839<br>TRCN0000106836<br>TRCN0000073848                   |
| 109 | H2AFY  | TRCN0000106691<br>TRCN0000106694<br>TRCN0000106690<br>TRCN0000106692<br>TRCN0000106693<br>TRCN0000097039                   |
| 110 | H2AFY3 | TRCN0000096926                                                                                                             |
| 111 | H2AFZ  | TRCN0000072583<br>TRCN0000072584<br>TRCN0000072585<br>TRCN0000072586<br>TRCN0000072587                                     |
| 112 | H2BFM  | TRCN0000015523<br>TRCN0000015524<br>TRCN0000015526<br>TRCN0000015527<br>TRCN0000139134<br>TRCN0000141476<br>TRCN0000015525 |
| 113 | HAT1   | TRCN0000034734<br>TRCN0000034735<br>TRCN0000034736<br>TRCN0000034737<br>TRCN0000034738                                     |
| 114 | HCFC1  | TRCN0000016263<br>TRCN0000016264<br>TRCN0000016265<br>TRCN0000016266<br>TRCN0000016267                                     |
| 115 | HDAC1  | TRCN0000004814                                                                                                             |

|     |        |                                                                                        |
|-----|--------|----------------------------------------------------------------------------------------|
|     |        | TRCN0000004815<br>TRCN0000004816<br>TRCN0000004817<br>TRCN0000004818                   |
| 116 | HDAC10 | TRCN0000004859<br>TRCN0000004860<br>TRCN0000004861<br>TRCN0000004862<br>TRCN0000004863 |
| 117 | HDAC11 | TRCN0000017753<br>TRCN0000017754<br>TRCN0000017755<br>TRCN0000017756<br>TRCN0000017757 |
| 118 | HDAC2  | TRCN0000004819<br>TRCN0000004820<br>TRCN0000004821<br>TRCN0000004822<br>TRCN0000004823 |
| 119 | HDAC3  | TRCN0000004824<br>TRCN0000004825<br>TRCN0000004826<br>TRCN0000004827<br>TRCN0000004828 |
| 120 | HDAC4  | TRCN0000004829<br>TRCN0000004830<br>TRCN0000004831<br>TRCN0000004832<br>TRCN0000004833 |
| 121 | HDAC5  | TRCN0000004834<br>TRCN0000004835<br>TRCN0000004836<br>TRCN0000004837<br>TRCN0000004838 |
| 122 | HDAC6  | TRCN0000004839<br>TRCN0000004840<br>TRCN0000004841<br>TRCN0000004842<br>TRCN0000004843 |
| 123 | HDAC7  | TRCN0000004844                                                                         |



|     |        |                                                                                                                            |
|-----|--------|----------------------------------------------------------------------------------------------------------------------------|
|     |        | TRCN0000004845<br>TRCN0000004846<br>TRCN0000004847<br>TRCN0000004848                                                       |
| 124 | HDAC8  | TRCN0000004849<br>TRCN0000004850<br>TRCN0000004851<br>TRCN0000004852<br>TRCN0000004853                                     |
| 125 | HDAC9  | TRCN0000004854<br>TRCN0000004855<br>TRCN0000004856<br>TRCN0000004857<br>TRCN0000004858                                     |
| 126 | HELLS  | TRCN0000000306<br>TRCN0000000307<br>TRCN0000000308<br>TRCN0000000309<br>TRCN0000000310                                     |
| 127 | HILS1  | TRCN0000106970<br>TRCN0000106971<br>TRCN0000106972<br>TRCN0000106973<br>TRCN0000106974                                     |
| 128 | HIRA   | TRCN0000020516<br>TRCN0000020515<br>TRCN0000020514<br>TRCN0000020515<br>TRCN0000020516<br>TRCN0000020517<br>TRCN0000020518 |
| 129 | HLTF   | TRCN0000003971<br>TRCN0000003972<br>TRCN0000003973<br>TRCN0000010836<br>TRCN0000003974                                     |
| 130 | HMG20B | TRCN0000015500<br>TRCN0000015499<br>TRCN0000015498<br>TRCN0000015501                                                       |

|     |       |                                                                                                                                              |
|-----|-------|----------------------------------------------------------------------------------------------------------------------------------------------|
| 131 | HMGA1 | TRCN000004909<br>TRCN0000018953<br>TRCN0000018950<br>TRCN0000018951<br>TRCN0000018949<br>TRCN0000018952                                      |
| 132 | HMGA2 | TRCN0000021964<br>TRCN0000021967<br>TRCN0000021968<br>TRCN0000021965<br>TRCN00000126047<br>TRCN0000021966                                    |
| 133 | HMGB1 | TRCN0000018930<br>TRCN0000018932<br>TRCN0000018934<br>TRCN0000092693<br>TRCN0000018933<br>TRCN0000063714<br>TRCN0000018931                   |
| 134 | HMGB2 | TRCN0000019009<br>TRCN0000019010<br>TRCN0000019013<br>TRCN0000019012<br>TRCN0000019011<br>TRCN0000092929<br>TRCN0000092932<br>TRCN0000092942 |
| 135 | HMGB3 | TRCN0000018518<br>TRCN0000018519<br>TRCN0000018520<br>TRCN0000071432<br>TRCN0000016705                                                       |
| 136 | HMGN1 | TRCN0000019059<br>TRCN0000019060<br>TRCN0000019061<br>TRCN0000019062<br>TRCN0000019063                                                       |
| 137 | HMGN2 | TRCN0000018551<br>TRCN0000018549<br>TRCN00000127823                                                                                          |

|     |             |                                                                                                          |
|-----|-------------|----------------------------------------------------------------------------------------------------------|
|     |             | TRCN0000018552<br>TRCN0000108988<br>TRCN0000130247<br>TRCN0000018548<br>TRCN0000018550                   |
| 138 | HMG3        | TRCN0000019105<br>TRCN0000019104<br>TRCN0000019108<br>TRCN0000019106<br>TRCN0000019107                   |
| 139 | HTATIP/KAT5 | TRCN0000020314<br>TRCN0000020315<br>TRCN0000020316<br>TRCN0000020317<br>TRCN0000020318                   |
| 140 | ING1        | TRCN0000073268<br>TRCN0000073269<br>TRCN0000073270<br>TRCN0000073271<br>TRCN0000073272                   |
| 141 | ING2        | TRCN0000019214<br>TRCN0000019215<br>TRCN0000019216<br>TRCN0000019217<br>TRCN0000019218                   |
| 142 | ING3        | TRCN0000073273<br>TRCN0000073277<br>TRCN0000073274<br>TRCN0000073275<br>TRCN0000073276                   |
| 143 | ING4        | TRCN0000128673<br>TRCN0000129127<br>TRCN0000129334<br>TRCN0000129395<br>TRCN0000131049<br>TRCN0000103947 |
| 144 | ING5        | TRCN0000020089<br>TRCN0000020091<br>TRCN0000020090<br>TRCN0000020092                                     |

|     |         |                                                                                                          |
|-----|---------|----------------------------------------------------------------------------------------------------------|
|     |         | TRCN0000020093                                                                                           |
| 145 | INOC1   | TRCN0000107555<br>TRCN0000107556<br>TRCN0000107557<br>TRCN0000107558<br>TRCN0000107559                   |
| 146 | JARID1A | TRCN0000014628<br>TRCN0000014629<br>TRCN0000014630<br>TRCN0000014631<br>TRCN0000014632                   |
| 147 | JARID1B | TRCN0000014758<br>TRCN0000014759<br>TRCN0000014760<br>TRCN0000014761<br>TRCN0000014762                   |
| 148 | JARID1C | TRCN0000022084<br>TRCN0000022085<br>TRCN0000022084<br>TRCN0000022085<br>TRCN0000022087<br>TRCN0000022088 |
| 149 | JARID1D | TRCN0000022114<br>TRCN0000022115<br>TRCN0000022116<br>TRCN0000022117<br>TRCN0000022118                   |
| 150 | JARID2  | TRCN0000107365<br>TRCN0000107366<br>TRCN0000107367<br>TRCN0000107368<br>TRCN0000107369                   |
| 151 | JMJD1A  | TRCN0000021149<br>TRCN0000021150<br>TRCN0000021151<br>TRCN0000021152<br>TRCN0000021153                   |
| 152 | JMJD1B  | TRCN0000017093<br>TRCN0000017094<br>TRCN0000017095                                                       |

|     |             |                                                                                        |
|-----|-------------|----------------------------------------------------------------------------------------|
|     |             | TRCN0000017096<br>TRCN0000017097                                                       |
| 153 | JMJD1C      | TRCN0000107560<br>TRCN0000107561<br>TRCN0000107562<br>TRCN0000107563<br>TRCN0000107564 |
| 154 | JMJD2A      | TRCN0000013493<br>TRCN0000013494<br>TRCN0000013495<br>TRCN0000013496<br>TRCN0000013497 |
| 155 | JMJD2B      | TRCN0000018013<br>TRCN0000018014<br>TRCN0000018015<br>TRCN0000018016<br>TRCN0000018017 |
| 156 | JMJD2C      | TRCN0000022054<br>TRCN0000022055<br>TRCN0000022056<br>TRCN0000022057<br>TRCN0000022058 |
| 157 | JMJD2D      | TRCN0000149641<br>TRCN0000149414<br>TRCN0000147186<br>TRCN0000148837<br>TRCN0000148192 |
| 158 | JMJD3/KDM6B | TRCN0000095268                                                                         |
| 159 | JMJD4       | TRCN0000138244<br>TRCN0000138555<br>TRCN0000138689<br>TRCN0000137919<br>TRCN0000138740 |
| 160 | JMJD5       | TRCN0000129536<br>TRCN0000128906<br>TRCN0000130971<br>TRCN0000130438<br>TRCN0000130552 |
| 161 | JMJD6       | TRCN0000063338<br>TRCN0000063339                                                       |

|     |         |                                                                                                                                 |
|-----|---------|---------------------------------------------------------------------------------------------------------------------------------|
|     |         | TRCN0000063340<br>TRCN0000063341<br>TRCN0000063342                                                                              |
| 162 | L3MBTL  | TRCN0000016863<br>TRCN0000016864<br>TRCN0000016865<br>TRCN0000016866<br>TRCN0000016867                                          |
| 163 | L3MBTL2 | TRCN0000021725<br>TRCN0000021728<br>TRCN0000021726<br>TRCN0000021727<br>TRCN0000021724                                          |
| 164 | MBD1    | TRCN0000015428<br>TRCN0000015429<br>TRCN0000015430<br>TRCN0000015431<br>TRCN0000015432                                          |
| 165 | MBD2    | TRCN0000013318<br>TRCN0000013319<br>TRCN0000013320<br>TRCN0000013321<br>TRCN0000013322                                          |
| 166 | MBD3    | TRCN0000017353<br>TRCN0000017354<br>TRCN0000017355<br>TRCN0000017356<br>TRCN0000017357                                          |
| 167 | MBD4    | TRCN0000013313<br>TRCN0000013314<br>TRCN0000013315<br>TRCN0000013316<br>TRCN0000013317                                          |
| 168 | MBTD1   | TRCN00000153466<br>TRCN00000152974<br>TRCN00000151070<br>TRCN00000150313<br>TRCN00000154234<br>TRCN0000078113<br>TRCN0000073848 |

|     |        |                                                                                                                            |
|-----|--------|----------------------------------------------------------------------------------------------------------------------------|
|     |        | TRCN0000097657<br>TRCN0000097655                                                                                           |
| 169 | MDC1   | TRCN0000018850<br>TRCN0000018851<br>TRCN0000018852<br>TRCN0000018853<br>TRCN0000018854                                     |
| 170 | MDS1   | TRCN0000015583<br>TRCN0000015584<br>TRCN0000015585<br>TRCN0000015586<br>TRCN0000015587                                     |
| 171 | MECP2  | TRCN0000021239<br>TRCN0000021240<br>TRCN0000021241<br>TRCN0000021242<br>TRCN0000021243                                     |
| 172 | MEN1   | TRCN0000040138<br>TRCN0000040139<br>TRCN0000040140<br>TRCN0000040141<br>TRCN0000040142                                     |
| 173 | METTL8 | TRCN0000007228                                                                                                             |
| 174 | MGMT   | TRCN0000022364<br>TRCN0000022365<br>TRCN0000022366<br>TRCN0000022367<br>TRCN0000022368                                     |
| 175 | MIER1  | TRCN0000108032<br>TRCN0000108030<br>TRCN0000108031<br>TRCN0000108033<br>TRCN0000108034<br>TRCN0000095734<br>TRCN0000095737 |
| 176 | MIER2  | TRCN0000137269<br>TRCN0000138895<br>TRCN0000138939<br>TRCN0000137227<br>TRCN0000137705                                     |

|     |           |                                                                                                          |
|-----|-----------|----------------------------------------------------------------------------------------------------------|
| 177 | MIER3     | TRCN0000127638<br>TRCN0000130779<br>TRCN0000129622<br>TRCN0000128394<br>TRCN0000129860                   |
| 178 | MLL1      | TRCN0000108069                                                                                           |
| 179 | MLL3      | TRCN0000008742<br>TRCN0000008743<br>TRCN0000008744<br>TRCN0000008745<br>TRCN0000008746<br>TRCN0000008746 |
| 180 | MLL4      | TRCN0000005958<br>TRCN0000005959<br>TRCN0000005960<br>TRCN0000005961<br>TRCN0000005962                   |
| 181 | MLL4/WBP7 | TRCN0000005958<br>TRCN0000005959<br>TRCN0000005960<br>TRCN0000005961<br>TRCN0000005962                   |
| 182 | MLL5      | TRCN0000150550<br>TRCN0000154711<br>TRCN0000155824<br>TRCN0000157609<br>TRCN0000158279                   |
| 183 | MLLT6     | TRCN0000019902<br>TRCN0000019899<br>TRCN0000019901<br>TRCN0000019903<br>TRCN0000019900<br>TRCN0000074123 |
| 184 | MORF4L1   | TRCN0000107580<br>TRCN0000107581<br>TRCN0000107582<br>TRCN0000107583<br>TRCN0000107584<br>TRCN0000015007 |
| 185 | MORF4L2   | TRCN0000107309                                                                                           |



|     |             |                                                                                                                            |
|-----|-------------|----------------------------------------------------------------------------------------------------------------------------|
|     |             | TRCN0000107307<br>TRCN0000107305<br>TRCN0000107306<br>TRCN0000107308<br>TRCN0000095666                                     |
| 186 | MPHOSPH8    | TRCN0000117922<br>TRCN0000117925<br>TRCN0000117923<br>TRCN0000117926<br>TRCN0000117924<br>TRCN0000085440                   |
| 187 | MSL3L1/MSL3 | TRCN0000022104<br>TRCN0000022105<br>TRCN0000022106<br>TRCN0000022107<br>TRCN0000022108                                     |
| 188 | MTA1        | TRCN0000013358<br>TRCN0000013359<br>TRCN0000013360<br>TRCN0000013361<br>TRCN0000013362                                     |
| 189 | MTA2        | TRCN0000013373<br>TRCN0000013374<br>TRCN0000013375<br>TRCN0000013376<br>TRCN0000013377                                     |
| 190 | MTA3        | TRCN0000016458<br>TRCN0000016459<br>TRCN0000016460<br>TRCN0000016461<br>TRCN0000016462                                     |
| 191 | MTF2        | TRCN0000107680<br>TRCN0000107681<br>TRCN0000107682<br>TRCN0000107683<br>TRCN0000107684<br>TRCN0000086133<br>TRCN0000086137 |
| 192 | MYST1       | TRCN0000034875<br>TRCN0000034876                                                                                           |

|     |        |                                                                                                          |
|-----|--------|----------------------------------------------------------------------------------------------------------|
|     |        | TRCN0000034877<br>TRCN0000034878                                                                         |
| 193 | MYST2  | TRCN0000021629<br>TRCN0000021630<br>TRCN0000021631<br>TRCN0000021632<br>TRCN0000021633                   |
| 194 | MYST3  | TRCN0000013123<br>TRCN0000013124<br>TRCN0000013125<br>TRCN0000013126                                     |
| 195 | MYST4  | TRCN0000019359<br>TRCN0000019360<br>TRCN0000019361<br>TRCN0000019362<br>TRCN0000019363                   |
| 196 | N6AMT1 | TRCN0000038755<br>TRCN0000038758<br>TRCN0000038754<br>TRCN0000038757<br>TRCN0000038756                   |
| 197 | N6AMT2 | TRCN0000139966<br>TRCN0000122732<br>TRCN0000140564<br>TRCN0000122562<br>TRCN0000145142                   |
| 198 | NAP1I1 | TRCN0000149610<br>TRCN0000149872<br>TRCN0000148741<br>TRCN0000149921<br>TRCN0000155836<br>TRCN0000092890 |
| 199 | NAP1L2 | TRCN0000147762<br>TRCN0000146531<br>TRCN0000146873<br>TRCN0000148173<br>TRCN0000147038                   |
| 200 | NAP1L3 | TRCN0000149156<br>TRCN0000147100<br>TRCN0000149498                                                       |

|     |        |                                                                                                                            |
|-----|--------|----------------------------------------------------------------------------------------------------------------------------|
|     |        | TRCN0000147275<br>TRCN0000149864                                                                                           |
| 201 | NAP1L4 | TRCN0000151475<br>TRCN0000154499<br>TRCN0000155016<br>TRCN0000151026<br>TRCN0000156041                                     |
| 202 | NCOA1  | TRCN0000004082<br>TRCN0000004080<br>TRCN0000004078<br>TRCN0000004079<br>TRCN0000095569<br>TRCN0000004081                   |
| 203 | NCOA3  | TRCN0000019699<br>TRCN0000019700<br>TRCN0000019701<br>TRCN0000019702<br>TRCN0000019703                                     |
| 204 | NCOA6  | TRCN0000063267<br>TRCN0000063264<br>TRCN0000063266<br>TRCN0000063263<br>TRCN0000063265<br>TRCN0000176319                   |
| 205 | NCOR1  | TRCN0000060654<br>TRCN0000060657<br>TRCN0000060656<br>TRCN0000060653<br>TRCN0000060655                                     |
| 206 | NCOR2  | TRCN0000060704<br>TRCN0000060706<br>TRCN0000060703<br>TRCN0000060707<br>TRCN0000060705<br>TRCN0000063970<br>TRCN0000095279 |
| 207 | NROB2  | TRCN0000033649<br>TRCN0000033650<br>TRCN0000033651<br>TRCN0000033652                                                       |

|     |            |                                                                                        |
|-----|------------|----------------------------------------------------------------------------------------|
|     |            | TRCN0000033653                                                                         |
| 208 | NSD1       | TRCN0000061353<br>TRCN0000061354<br>TRCN0000061356<br>TRCN0000061357                   |
| 209 | PADI4      | TRCN0000051678<br>TRCN0000051679<br>TRCN0000051680<br>TRCN0000051681                   |
| 210 | PARP1      | TRCN0000007928<br>TRCN0000007929<br>TRCN0000007930<br>TRCN0000007931<br>TRCN0000007932 |
| 211 | PARP2      | TRCN0000007933<br>TRCN0000007934<br>TRCN0000007935<br>TRCN0000007936<br>TRCN0000007937 |
| 212 | PAX5       | TRCN0000016058<br>TRCN0000016059<br>TRCN0000016060<br>TRCN0000016061<br>TRCN0000016062 |
| 213 | PAXIP1     | TRCN0000128479<br>TRCN0000150101<br>TRCN0000147957<br>TRCN0000147635<br>TRCN0000129174 |
| 214 | PBRM1      | TRCN0000015995<br>TRCN0000015994<br>TRCN0000015993<br>TRCN0000015997<br>TRCN0000007228 |
| 215 | PCAF/KAT2B | TRCN0000018528<br>TRCN0000018529<br>TRCN0000018530<br>TRCN0000018531<br>TRCN0000018532 |
| 216 | PCGF1      | TRCN0000073131                                                                         |

|     |       |                                                                                                                            |
|-----|-------|----------------------------------------------------------------------------------------------------------------------------|
|     |       | TRCN0000073128<br>TRCN0000073129<br>TRCN0000073130<br>TRCN0000073132                                                       |
| 217 | PCGF2 | TRCN0000022029<br>TRCN0000022030<br>TRCN0000022031<br>TRCN0000022032<br>TRCN0000022033                                     |
| 218 | PCGF3 | TRCN0000095494                                                                                                             |
| 219 | PCGF5 | TRCN0000073113<br>TRCN0000073115<br>TRCN0000073117<br>TRCN0000073116<br>TRCN0000140719<br>TRCN0000095162<br>TRCN0000073114 |
| 220 | PCGF6 | TRCN0000073108<br>TRCN0000073109<br>TRCN0000073112<br>TRCN0000073110<br>TRCN0000073111<br>TRCN0000095301                   |
| 221 | PCMT1 | TRCN0000036399<br>TRCN0000036400<br>TRCN0000036401<br>TRCN0000036402<br>TRCN0000036403                                     |
| 222 | PCNA  | TRCN0000003861<br>TRCN0000003862<br>TRCN0000003863<br>TRCN0000003864<br>TRCN0000010826                                     |
| 223 | PHF1  | TRCN0000019184<br>TRCN0000019185<br>TRCN0000019186<br>TRCN0000019187<br>TRCN0000019188                                     |
| 224 | PHF11 | TRCN0000020112<br>TRCN0000020110                                                                                           |

|     |       |                                                                                                                                              |
|-----|-------|----------------------------------------------------------------------------------------------------------------------------------------------|
|     |       | TRCN0000020111<br>TRCN0000020113<br>TRCN0000020109<br>TRCN0000073848                                                                         |
| 225 | PHF12 | TRCN0000015705<br>TRCN0000015706<br>TRCN0000015707<br>TRCN0000015704<br>TRCN0000015703<br>TRCN0000007228<br>TRCN0000084422<br>TRCN0000084419 |
| 226 | PHF13 | TRCN0000019637<br>TRCN0000019635<br>TRCN0000019634<br>TRCN0000019636<br>TRCN0000019638                                                       |
| 227 | PHF14 | TRCN0000019310<br>TRCN0000019309<br>TRCN0000019311<br>TRCN0000019312<br>TRCN0000019313                                                       |
| 228 | PHF15 | TRCN0000018515<br>TRCN0000018516<br>TRCN0000018513<br>TRCN0000018517<br>TRCN0000018514                                                       |
| 229 | PHF16 | TRCN0000019554<br>TRCN0000019555<br>TRCN0000019556<br>TRCN0000019558<br>TRCN0000019557                                                       |
| 230 | PHF17 | TRCN0000019621<br>TRCN0000019619<br>TRCN0000019620<br>TRCN0000019622<br>TRCN0000019623                                                       |
| 231 | PHF19 | TRCN00000108185<br>TRCN00000108188<br>TRCN00000108189                                                                                        |

|     |          |                                                                                                          |
|-----|----------|----------------------------------------------------------------------------------------------------------|
|     |          | TRCN0000108187<br>TRCN0000108186                                                                         |
| 232 | PHF20    | TRCN0000016316<br>TRCN0000016313<br>TRCN0000016317<br>TRCN0000016314<br>TRCN0000016315                   |
| 233 | PHF21A   | TRCN0000037003<br>TRCN0000037000<br>TRCN0000036999<br>TRCN0000037001<br>TRCN0000037002<br>TRCN0000124326 |
| 234 | PHF23    | TRCN0000019259<br>TRCN0000019263<br>TRCN0000019261<br>TRCN0000019262<br>TRCN0000019260                   |
| 235 | PHF3     | TRCN0000019114<br>TRCN0000019115<br>TRCN0000019116<br>TRCN0000019117<br>TRCN0000019118                   |
| 236 | PHF8     | TRCN0000118317<br>TRCN0000118318<br>TRCN0000118319<br>TRCN0000118320<br>TRCN0000118321                   |
| 237 | PML      | TRCN0000003866<br>TRCN0000003867<br>TRCN0000003868<br>TRCN0000003869                                     |
| 238 | POLR2B   | TRCN0000021314<br>TRCN0000021315<br>TRCN0000021316<br>TRCN0000021317<br>TRCN0000021318                   |
| 239 | PPARGC1A | TRCN0000001165<br>TRCN0000001166<br>TRCN0000001167                                                       |

|     |        |                                                                                        |
|-----|--------|----------------------------------------------------------------------------------------|
|     |        | TRCN0000001168<br>TRCN0000001169                                                       |
| 240 | PRDM1  | TRCN0000013608<br>TRCN0000013609<br>TRCN0000013610<br>TRCN0000013611<br>TRCN0000013612 |
| 241 | PRDM10 | TRCN0000016843<br>TRCN0000016844<br>TRCN0000016845<br>TRCN0000016846<br>TRCN0000016847 |
| 242 | PRDM11 | TRCN0000016888<br>TRCN0000016889<br>TRCN0000016890<br>TRCN0000016891<br>TRCN0000016892 |
| 243 | PRDM12 | TRCN0000017948<br>TRCN0000017949<br>TRCN0000017950<br>TRCN0000017951<br>TRCN0000017952 |
| 244 | PRDM13 | TRCN0000018003<br>TRCN0000018004<br>TRCN0000018005<br>TRCN0000018006<br>TRCN0000018007 |
| 245 | PRDM14 | TRCN0000018523<br>TRCN0000018524<br>TRCN0000018525<br>TRCN0000018526<br>TRCN0000018527 |
| 246 | PRDM16 | TRCN0000020044<br>TRCN0000020045<br>TRCN0000020046<br>TRCN0000020047<br>TRCN0000020048 |
| 247 | PRDM2  | TRCN0000013098<br>TRCN0000013099<br>TRCN0000013100                                     |



|     |        |                                                                                        |
|-----|--------|----------------------------------------------------------------------------------------|
|     |        | TRCN0000013101<br>TRCN0000013102                                                       |
| 248 | PRDM4  | TRCN0000015333<br>TRCN0000015334<br>TRCN0000015335<br>TRCN0000015336<br>TRCN0000015337 |
| 249 | PRDM5  | TRCN0000015258<br>TRCN0000015259<br>TRCN0000015260<br>TRCN0000015261<br>TRCN0000015262 |
| 250 | PRDM8  | TRCN0000016758<br>TRCN0000016759<br>TRCN0000016760<br>TRCN0000016761<br>TRCN0000016762 |
| 251 | PRDM9  | TRCN0000016803<br>TRCN0000016804<br>TRCN0000016805<br>TRCN0000016806<br>TRCN0000016807 |
| 252 | PRKAA1 | TRCN0000000857<br>TRCN0000000858<br>TRCN0000000859<br>TRCN0000000860<br>TRCN0000000861 |
| 253 | PRKAA2 | TRCN0000002168<br>TRCN0000002169<br>TRCN0000002170<br>TRCN0000002171<br>TRCN0000002172 |
| 254 | PRKCD  | TRCN0000010202<br>TRCN0000010193<br>TRCN0000010194<br>TRCN0000010203                   |
| 255 | PRMT1  | TRCN0000035929<br>TRCN0000035930<br>TRCN0000035931<br>TRCN0000035932                   |

|     |       |                                                                                        |
|-----|-------|----------------------------------------------------------------------------------------|
|     |       | TRCN0000035933                                                                         |
| 256 | PRMT2 | TRCN0000035894<br>TRCN0000035895<br>TRCN0000035896<br>TRCN0000035897<br>TRCN0000035898 |
| 257 | PRMT3 | TRCN0000034569<br>TRCN0000034570<br>TRCN0000034571<br>TRCN0000034572<br>TRCN0000034573 |
| 258 | PRMT5 | TRCN0000107085<br>TRCN0000107088<br>TRCN0000107087<br>TRCN0000107089<br>TRCN0000107086 |
| 259 | PRMT6 | TRCN0000034684<br>TRCN0000034685<br>TRCN0000034686<br>TRCN0000034687<br>TRCN0000034688 |
| 260 | PRMT7 | TRCN0000035149<br>TRCN0000035150<br>TRCN0000035151<br>TRCN0000035152<br>TRCN0000035153 |
| 261 | PRMT8 | TRCN0000034749<br>TRCN0000034750<br>TRCN0000034751<br>TRCN0000034752<br>TRCN0000034753 |
| 262 | PSIP1 | TRCN0000074818<br>TRCN0000074819<br>TRCN0000074820<br>TRCN0000074821<br>TRCN0000074822 |
| 263 | PYGO1 | TRCN0000129967<br>TRCN0000148786<br>TRCN0000149986<br>TRCN0000128133                   |

|     |       |                                                                                                          |
|-----|-------|----------------------------------------------------------------------------------------------------------|
|     |       | TRCN0000130684                                                                                           |
| 264 | PYGO2 | TRCN0000021861<br>TRCN0000021862<br>TRCN0000021863<br>TRCN0000021860<br>TRCN0000021859                   |
| 265 | RAG2  | TRCN0000051228<br>TRCN0000051229<br>TRCN0000051230<br>TRCN0000051231<br>TRCN0000051232                   |
| 266 | RBBP4 | TRCN0000115870<br>TRCN0000115867<br>RCN0000115868<br>TRCN0000115869<br>TRCN0000115871                    |
| 267 | RBBP5 | TRCN0000034410<br>TRCN0000034413                                                                         |
| 268 | RBBP7 | TRCN0000038888<br>TRCN0000038887<br>TRCN0000038884<br>TRCN0000038886<br>TRCN0000038885                   |
| 269 | RCOR1 | TRCN0000128570<br>TRCN0000129660<br>TRCN0000147184<br>TRCN0000128260<br>TRCN0000147902                   |
| 270 | RCOR2 | TRCN0000143126<br>TRCN0000140491<br>TRCN0000140769<br>TRCN0000140462                                     |
| 271 | RCOR3 | TRCN0000116087<br>TRCN0000116089<br>TRCN0000116090<br>TRCN0000116091<br>TRCN0000116088<br>TRCN0000126692 |
| 272 | RERE  | TRCN0000013578<br>TRCN0000013579                                                                         |

|     |       |                                                                                        |
|-----|-------|----------------------------------------------------------------------------------------|
|     |       | TRCN0000013580<br>TRCN0000013581<br>TRCN0000013582                                     |
| 273 | RING1 | TRCN0000021989<br>TRCN0000021990<br>TRCN0000021991<br>TRCN0000021992<br>TRCN0000021993 |
| 274 | RNF2  | TRCN0000033694<br>TRCN0000033695<br>TRCN0000033696<br>TRCN0000033697<br>TRCN0000033698 |
| 275 | RNF20 | TRCN0000033874<br>TRCN0000033875<br>TRCN0000033876<br>TRCN0000033877<br>TRCN0000033878 |
| 276 | RNF40 | TRCN0000004784<br>TRCN0000004780<br>TRCN0000004782<br>TRCN0000004781<br>TRCN0000004783 |
| 277 | RNF6  | TRCN0000033699<br>TRCN0000033700<br>TRCN0000033701<br>TRCN0000033702<br>TRCN0000033703 |
| 278 | RPA1  | TRCN0000010985<br>TRCN0000005984<br>TRCN0000010982<br>TRCN0000010983<br>TRCN0000005985 |
| 279 | RPA3  | TRCN0000018860<br>TRCN0000018861<br>TRCN0000018862<br>TRCN0000018863<br>TRCN0000018864 |
| 280 | RSF1  | TRCN00000128361<br>TRCN00000128484                                                     |

|     |        |                                                                                                           |
|-----|--------|-----------------------------------------------------------------------------------------------------------|
|     |        | TRCN0000128604<br>TRCN0000148481                                                                          |
| 281 | RUVBL1 | TRCN0000018914<br>TRCN0000018912<br>TRCN0000018913<br>TRCN0000018910<br>TRCN0000018911<br>TRCN00000115241 |
| 282 | RUVBL2 | TRCN0000051564<br>TRCN0000051567<br>TRCN0000051565<br>TRCN0000051563<br>TRCN0000051566                    |
| 283 | SAP18  | TRCN0000021663<br>TRCN0000021659<br>TRCN0000021660<br>TRCN0000021661<br>TRCN0000021662                    |
| 284 | SATB1  | TRCN0000017173<br>TRCN0000017174<br>TRCN0000017175<br>TRCN0000017176<br>TRCN0000017177                    |
| 285 | SATB2  | TRCN0000020688<br>TRCN0000020687<br>TRCN0000020684<br>TRCN0000020686<br>TRCN0000020685<br>TRCN00000140719 |
| 286 | SCML2  | TRCN0000019397<br>TRCN0000019395<br>TRCN0000019396<br>TRCN0000019394                                      |
| 287 | SETD2  | TRCN0000003029<br>TRCN0000003030<br>TRCN0000003031<br>TRCN0000003032<br>TRCN0000003033                    |
| 288 | SETD3  | TRCN00000139106<br>TRCN00000121628                                                                        |

|     |        |                                                                                                                                                                |
|-----|--------|----------------------------------------------------------------------------------------------------------------------------------------------------------------|
|     |        | TRCN0000122097<br>TRCN0000143148<br>TRCN0000143640<br>TRCN0000175757<br>TRCN0000134840<br>TRCN0000137191<br>TRCN0000134946<br>TRCN0000137911<br>TRCN0000137161 |
| 289 | SETD5  | TRCN0000098703<br>TRCN0000098704                                                                                                                               |
| 290 | SETD7  | TRCN0000078628<br>TRCN0000078629<br>TRCN0000078630<br>TRCN0000078631<br>TRCN0000078632                                                                         |
| 291 | SETD8  | TRCN0000130139<br>TRCN0000130036<br>TRCN0000148268<br>TRCN0000128082                                                                                           |
| 292 | SFMBT1 | TRCN0000146760<br>TRCN0000146761<br>TRCN0000147760<br>TRCN0000148746<br>TRCN0000147815                                                                         |
| 293 | SFMBT2 | TRCN0000148663<br>TRCN0000149533<br>TRCN0000149620<br>TRCN0000149672<br>TRCN0000146511                                                                         |
| 294 | SIN3A  | TRCN0000021774<br>TRCN0000021775<br>TRCN0000021776<br>TRCN0000021777<br>TRCN0000021778                                                                         |
| 295 | SIN3B  | TRCN0000107807<br>TRCN0000107805<br>TRCN0000107809<br>TRCN0000107808<br>TRCN0000107806                                                                         |

|     |         |                                                                                        |
|-----|---------|----------------------------------------------------------------------------------------|
| 296 | SIRT1   | TRCN0000018979<br>TRCN0000018980<br>TRCN0000018981<br>TRCN0000018982<br>TRCN0000018983 |
| 297 | SIRT2   | TRCN0000040218<br>TRCN0000040219<br>TRCN0000040220<br>TRCN0000040221<br>TRCN0000040222 |
| 298 | SIRT3   | TRCN0000038890<br>TRCN0000038891<br>TRCN0000038892<br>TRCN0000038893                   |
| 299 | SIRT4   | TRCN0000018944<br>TRCN0000018945<br>TRCN0000018946<br>TRCN0000018947<br>TRCN0000018948 |
| 300 | SIRT5   | TRCN0000018543<br>TRCN0000018544<br>TRCN0000018545<br>TRCN0000018546<br>TRCN0000018547 |
| 301 | SIRT6   | TRCN0000050473<br>TRCN0000050474<br>TRCN0000050475<br>TRCN0000050476<br>TRCN0000050477 |
| 302 | SIRT7   | TRCN0000020254<br>TRCN0000020255<br>TRCN0000020256<br>TRCN0000020257<br>TRCN0000020258 |
| 303 | SMARCA1 | TRCN0000050623<br>TRCN0000050624<br>TRCN0000050625<br>TRCN0000050626<br>TRCN0000050627 |
| 304 | SMARCA2 | TRCN0000020329                                                                         |

|     |          |                                                                                                                                              |
|-----|----------|----------------------------------------------------------------------------------------------------------------------------------------------|
|     |          | TRCN0000020330<br>TRCN0000020331<br>TRCN0000020332<br>TRCN0000020333                                                                         |
| 305 | SMARCA4  | TRCN0000015548<br>TRCN0000015549<br>TRCN0000015550<br>TRCN0000015551<br>TRCN0000015552                                                       |
| 306 | SMARCA5  | TRCN0000013213<br>TRCN0000013214<br>TRCN0000013215<br>TRCN0000013216<br>TRCN0000013217                                                       |
| 307 | SMARCAD1 | TRCN0000050048<br>TRCN0000050051<br>TRCN0000050052<br>TRCN0000050049                                                                         |
| 308 | SMARCAL1 | TRCN0000083572<br>TRCN0000083568<br>TRCN0000083569<br>TRCN0000083570<br>TRCN0000083571                                                       |
| 309 | SMARCB1  | TRCN0000010503<br>TRCN0000039583<br>TRCN0000039584<br>TRCN0000010504<br>TRCN0000039587<br>TRCN0000039585<br>TRCN0000010502<br>TRCN0000039586 |
| 310 | SMARCC1  | TRCN0000015628<br>TRCN0000015631<br>TRCN0000015629<br>TRCN0000015630<br>TRCN0000015632                                                       |
| 311 | SMARCC2  | TRCN0000015698<br>TRCN0000015699<br>TRCN0000015701<br>TRCN0000015702                                                                         |



|     |         |                                                                                                          |
|-----|---------|----------------------------------------------------------------------------------------------------------|
| 312 | SMARCD1 | TRCN0000151662<br>TRCN0000157022<br>TRCN0000153623<br>TRCN0000158153<br>TRCN0000157443<br>TRCN0000092957 |
| 313 | SMARCD2 | TRCN0000021267<br>TRCN0000021266<br>TRCN0000021265<br>TRCN0000021264<br>TRCN0000021268                   |
| 314 | SMARCE1 | TRCN0000015778<br>TRCN0000015779<br>TRCN0000015780<br>TRCN0000015781<br>TRCN0000015782                   |
| 315 | SMYD1   | TRCN0000129092<br>TRCN0000130477<br>TRCN0000130695<br>TRCN0000127839<br>TRCN0000128991                   |
| 316 | SMYD2   | TRCN0000128189<br>TRCN0000130403<br>TRCN0000128349<br>TRCN0000130774                                     |
| 317 | SMYD3   | TRCN0000123289<br>TRCN0000123292<br>TRCN0000123293<br>TRCN0000123290<br>TRCN0000123291                   |
| 318 | SRCAP   | TRCN0000021354<br>TRCN0000021355<br>TRCN0000021356<br>TRCN0000021357<br>TRCN0000021358                   |
| 319 | SSRP1   | TRCN0000019269<br>TRCN0000019270<br>TRCN0000019271<br>TRCN0000019272<br>TRCN0000019273                   |

|     |               |                                                                                                          |
|-----|---------------|----------------------------------------------------------------------------------------------------------|
| 320 | SUDS3         | TRCN0000038912<br>TRCN0000038909<br>TRCN0000038910<br>TRCN0000038911<br>TRCN0000038913<br>TRCN0000039314 |
| 321 | SUPT16H       | TRCN0000001257<br>TRCN0000001258<br>TRCN0000001259<br>TRCN0000001260<br>TRCN0000001261                   |
| 322 | SUV39H1       | TRCN0000158337<br>TRCN0000150622<br>TRCN0000158270<br>TRCN0000157251<br>TRCN0000157285                   |
| 323 | SUV39H2       | TRCN0000006935<br>TRCN0000006936<br>TRCN0000006937<br>TRCN0000011057<br>TRCN0000006938                   |
| 324 | Suv420h1      | TRCN0000130417<br>TRCN0000129968<br>TRCN0000130307<br>TRCN0000128012<br>TRCN0000130388<br>TRCN0000039198 |
| 325 | Suv420h2      | TRCN0000141493<br>TRCN0000141926<br>TRCN0000143766<br>TRCN0000142036<br>TRCN0000141258<br>TRCN0000039200 |
| 326 | SUZ12         | TRCN0000038724<br>TRCN0000038725<br>TRCN0000038726<br>TRCN0000038727<br>TRCN0000038728                   |
| 327 | TADA2L/TADA2A | TRCN0000017299<br>TRCN0000017298                                                                         |

|     |              |                                                                                        |
|-----|--------------|----------------------------------------------------------------------------------------|
|     |              | TRCN0000017302<br>TRCN0000017301<br>TRCN0000017300                                     |
| 328 | TADA3/TADA3L | TRCN0000015737<br>TRCN0000015733<br>TRCN0000015736<br>TRCN0000015734<br>TRCN0000015735 |
| 329 | TAF1         | TRCN0000006284<br>TRCN0000006285<br>TRCN0000006286<br>TRCN0000006287<br>TRCN0000006288 |
| 330 | TAF3         | TRCN0000016608<br>TRCN0000016609<br>TRCN0000016610<br>TRCN0000016611<br>TRCN0000016612 |
| 331 | TBL1X        | TRCN0000118647<br>TRCN0000118648<br>TRCN0000118649<br>TRCN0000118650<br>TRCN0000118651 |
| 332 | TDRD3        | TRCN0000073294<br>TRCN0000073293<br>TRCN0000073295<br>TRCN0000073296<br>TRCN0000073297 |
| 333 | TET1         | TRCN0000075027<br>TRCN0000075025<br>TRCN0000075024<br>TRCN0000075026<br>TRCN0000075023 |
| 334 | TET2         | TRCN0000122172<br>TRCN0000139778<br>TRCN0000142853<br>TRCN0000144344<br>TRCN0000145351 |
| 335 | TLK1         | TRCN0000007056<br>TRCN0000007057                                                       |

|     |          |                                                                                                          |
|-----|----------|----------------------------------------------------------------------------------------------------------|
|     |          | TRCN0000007058<br>TRCN0000007059<br>TRCN0000007060                                                       |
| 336 | TLK2     | TRCN0000002361<br>TRCN0000002362<br>TRCN0000002363<br>TRCN0000002364<br>TRCN0000002365                   |
| 337 | TRIM24   | TRCN0000021260<br>TRCN0000021259<br>TRCN0000021262<br>TRCN0000021263<br>TRCN0000021261<br>TRCN0000088522 |
| 338 | TRIM28   | TRCN0000017999<br>TRCN0000018002<br>TRCN0000018000<br>TRCN0000018001<br>TRCN0000017998                   |
| 339 | TRIM33   | TRCN0000022008<br>TRCN0000022004<br>TRCN0000022005<br>TRCN0000022006<br>TRCN0000022007<br>TRCN0000007228 |
| 340 | TRP53BP1 | TRCN0000081779                                                                                           |
| 341 | TRRAP    | TRCN0000005363<br>TRCN0000005361<br>TRCN0000005362<br>TRCN0000005364<br>TRCN0000005365                   |
| 342 | UBE2A    | TRCN0000010842<br>TRCN0000004005<br>TRCN0000004006<br>TRCN0000004007<br>TRCN0000004008                   |
| 343 | UBE2B    | TRCN0000004009<br>TRCN0000004010<br>TRCN0000004011<br>TRCN0000004012                                     |

|     |          |                                                                                                                            |
|-----|----------|----------------------------------------------------------------------------------------------------------------------------|
|     |          | TRCN0000004013                                                                                                             |
| 344 | UBE2E1   | TRCN0000004014<br>TRCN0000004015<br>TRCN0000004016<br>TRCN0000004017<br>TRCN0000004018                                     |
| 345 | UBE2I    | TRCN0000011077<br>TRCN0000007205<br>TRCN0000007206<br>TRCN0000011078<br>TRCN0000007207<br>TRCN0000011078<br>TRCN0000011077 |
| 346 | UHRF1    | TRCN0000004353<br>TRCN0000004352<br>TRCN0000004356<br>TRCN0000004354<br>TRCN0000004355<br>TRCN00000112188                  |
| 347 | UHRF1BP1 | TRCN0000064774<br>TRCN0000064777<br>TRCN0000064776<br>TRCN0000064773<br>TRCN0000064775<br>TRCN0000073848                   |
| 348 | UHRF2    | TRCN0000003479<br>TRCN0000003481<br>TRCN0000003480<br>TRCN0000003482<br>TRCN0000010793<br>TRCN0000040626                   |
| 349 | USP22    | TRCN0000046924<br>TRCN0000046925<br>TRCN0000046926<br>TRCN0000046927                                                       |
| 350 | USP51    | TRCN0000038849<br>TRCN0000038850<br>TRCN0000038851<br>TRCN0000038852<br>TRCN0000038853                                     |

|     |         |                                                                                        |
|-----|---------|----------------------------------------------------------------------------------------|
| 351 | UTX     | TRCN0000107760<br>TRCN0000107761<br>TRCN0000107762<br>TRCN0000107763<br>TRCN0000107764 |
| 352 | WDR5    | TRCN0000118047<br>TRCN0000118048<br>TRCN0000118049<br>TRCN0000118050<br>TRCN0000118051 |
| 353 | WDR54   | TRCN0000072663<br>TRCN0000072664<br>TRCN0000072665<br>TRCN0000072666<br>TRCN0000072667 |
| 354 | WDR82   | TRCN0000130689<br>TRCN0000129877<br>TRCN0000128304<br>TRCN0000127796<br>TRCN0000130791 |
| 355 | WHSC1   | TRCN0000019814<br>TRCN0000019815<br>TRCN0000019816<br>TRCN0000019817<br>TRCN0000019818 |
| 356 | WHSC1L1 | TRCN0000015613<br>TRCN0000015614<br>TRCN0000015615<br>TRCN0000015616<br>TRCN0000015617 |
| 357 | WNT5A   | TRCN0000062713<br>TRCN0000062714<br>TRCN0000062715<br>TRCN0000062716<br>TRCN0000062717 |
| 358 | YEATS4  | TRCN0000013143<br>TRCN0000013144<br>TRCN0000013146<br>TRCN0000013145<br>TRCN0000013147 |

|     |         |                                                                                                          |
|-----|---------|----------------------------------------------------------------------------------------------------------|
| 359 | ZCWPW1  | TRCN0000139148<br>TRCN0000140908<br>TRCN0000145000<br>TRCN0000139000<br>TRCN0000140405                   |
| 360 | ZFPM1   | TRCN0000107406<br>TRCN0000107408<br>TRCN0000107407<br>TRCN0000107405<br>TRCN0000107409                   |
| 361 | ZMYND11 | TRCN0000021253<br>TRCN0000021251<br>TRCN0000021252<br>TRCN0000021249<br>TRCN0000021250<br>TRCN0000088135 |
| 362 | ZMYND8  | TRCN0000037997<br>TRCN0000037996<br>TRCN0000037998<br>TRCN0000037995<br>TRCN0000037994<br>TRCN0000007228 |
| 363 | ZNFX1   | TRCN0000017371<br>TRCN0000017369<br>TRCN0000017372<br>TRCN0000017368<br>TRCN0000017370<br>TRCN0000073848 |

**Table S2:** List of genes for which multiple shRNAs were isolated from the epigenome-wide shRNA screen.

| <b>S.No.</b> | <b>Gene Symbol</b>  | <b>Gene Name</b>                                  | <b>Accession Number</b> |
|--------------|---------------------|---------------------------------------------------|-------------------------|
| <b>1</b>     | <b><i>BOP1</i></b>  | Block of Proliferation                            | NM_015201.4             |
| <b>2</b>     | <b><i>HAT1</i></b>  | Histone acetyltransferase 1                       | NM_003642.3             |
| <b>3</b>     | <b><i>HMGB1</i></b> | High mobility group protein B1                    | NM_001313892            |
| <b>4</b>     | <b><i>HMGNI</i></b> | High mobility group nucleosomal binding protein 1 | NM_004965.6             |
| <b>5</b>     | <b><i>ING5</i></b>  | Inhibitor of growth 5                             | NM_001330161.1          |
| <b>6</b>     | <b><i>KDM4C</i></b> | Lysine-specific demethylase 4C                    | NM_001146695            |



**Table S3:** Patient sample information used for BOP1 expression analysis.

| S.No.   | SAMPLE ID | STAGE  | MUTATION | TREATMENT         | RESPONSE | SAMPLES ANALYZED            | BOP1 PROTEIN EXPRESSION IN PROGRESSED SAMPLES |
|---------|-----------|--------|----------|-------------------|----------|-----------------------------|-----------------------------------------------|
| Pair 1  | #1218     | IV M1c | V600E    | Seq. BRAFi + MEKi | SD       | Matched Pre- and progressed | Downregulated                                 |
| Pair 2  | #1117     | IV M1c | V600E    | Dual BRAFi + MEKi | PR       | Matched Pre- and progressed | Downregulated                                 |
| Pair 3  | #848      | IV M1c | V600E    | Dual BRAFi + MEKi | PR       | Matched Pre- and progressed | Downregulated                                 |
| Pair 4  | #757      | IV M1c | V600E    | BRAFi             | PR       | Matched Pre- and progressed | Downregulated                                 |
| Pair 5  | #0470     | IV M1c | V600K    | BRAFi             | PR       | Matched Pre- and progressed | Downregulated                                 |
| Pair 6  | #0959     | IV M1a | V600E    | BRAFi             | PR       | Matched Pre- and progressed | Downregulated                                 |
| Pair 7  | #0923     | IV M1c | V600E    | Dual BRAFi + MEKi | PR       | Matched Pre- and progressed | Downregulated                                 |
| Pair 8  | #2132     | IV M1c | V600E    | Dual BRAFi + MEKi | PR       | Matched Pre- and progressed | Unchanged                                     |
| Pair 9  | #1351     | IV M1a | V600E    | Seq. BRAFi + MEKi | PR       | Matched Pre- and progressed | Unchanged                                     |
| Pair 10 | #1577     | IV M1c | V600E    | Dual BRAFi + MEKi | PR       | Matched Pre- and progressed | Upregulated                                   |
| Pair 11 | #1254     | IV M1c | V600E    | BRAFi             | PR       | Matched Pre- and progressed | Upregulated                                   |

SD: Stable disease  
PR: Partial response  
Seq: Sequential

**Table S4:** Primer sequences, clone IDs, catalog numbers, antibodies, and chemical inhibitors used in this study. Primers were used for qRT-PCR analysis. The shRNAs used herein were obtained from Open Biosystems; clone IDs and catalog numbers are listed. The antibodies were used for immunoblot analyses. The source and concentrations of chemical inhibitors used for drug treatment experiments are summarized.

| Application   | Gene symbol          | Forward primer (5'-3') | Reverse primer (5'-3') |
|---------------|----------------------|------------------------|------------------------|
| RT-qPCR       | <i>BOP1</i>          | aggactcggctgctgctg     | cccacttggcgctcctcctc   |
|               | <i>HAT1</i>          | tggcagatagaggcacaacag  | acacgccggaatctccac     |
|               | <i>KDM4C</i>         | gcagacaccgggtaagagg    | cttctcgcaagcctggact    |
|               | <i>HMGB1</i>         | ggagaacatcctggcctgtc   | cagcttcgcagcctctttt    |
|               | <i>HMGN1</i>         | aaacaggccgaagtggctaa   | agggagacaggaccactga    |
|               | <i>ING5</i>          | cccaaacgaaccacgtact    | gggttctggtgaaggcca     |
|               | <i>DUSP1</i>         | tgtggaggacaaccacaagg   | aaactcaaaggcctctgcca   |
|               | <i>DUSP2</i>         | ctgtcccgatctgtgctctg   | ccatctggtgtcctccaca    |
|               | <i>DUSP4</i>         | gaggggaatggacaccacat   | tgtctcctccaaagccatt    |
|               | <i>DUSP5</i>         | ggatccctgtggaagacagc   | gaccatgctcctctgct      |
|               | <i>DUSP6</i>         | ttgagacgctcgtgtttgt    | agccgctggctcttagtgc    |
|               | <i>DUSP7</i>         | ctcgcaagtatggcatcaa    | ggtcagagatggggatctgc   |
|               | <i>DUSP8</i>         | cgccctctctgtgttctt     | gacagaggaacgggaacag    |
|               | <i>DUSP9</i>         | cacacatctgtgggctgtt    | cacaggggtgtggacagaaa   |
|               | <i>DUSP10</i>        | ccgacctcaggatctcaacc   | cctgtcgtaggtgcccaca    |
|               | <i>DUSP16</i>        | cagactccgaaccagctcc    | ccagcagactctgtgagggtg  |
|               | <i>MX-YTX</i>        | caccaagagggtggaagagg   | ctccaagggcagaaggaatg   |
|               | <i>SPRY1</i>         | ccaagcaactgatttgga     | Gtagggctctgggagcagtg   |
|               | <i>SPRY2</i>         | agtcgtctccagctccgaac   | Cctgagctctggcctccat    |
|               | <i>PP2A</i>          | atcttgcctgcatcaagga    | Tctttgccagaatgggaga    |
|               | <i>PP2C</i>          | tgtcatgcacatctgtctg    | tcagcagggttcttctcc     |
|               | <i>HePTP</i>         | caccacacttggccctgta    | acttcccagaccacctt      |
|               | <i>DUSP3</i>         | gtgtgatggatgtgtggg     | tcattgtcctggctgagt     |
|               | <i>PTP-SL</i>        | ggcataaagggtgctctgc    | agcctcgaatgggacaga     |
|               | <i>STEP</i>          | tgtgtcctcagccaggaa     | tgccctaactcccgtcatct   |
|               | <i>CIRH1A</i>        | caggcagcgtgtcataag     | gtcccagaactgcacctcc    |
|               | <i>DKC1</i>          | tgggagttggtgctcagatg   | tcaatgccgtcctcatalcg   |
|               | <i>EMG1</i>          | accgaattccagaacctt     | ggccccctaccacaaaaacaa  |
|               | <i>HCA66</i>         | aagggtccaaaagccaagaa   | ctgaaaatggtcggctctcc   |
|               | <i>NHP2</i>          | tcacgcggaagctctacaaa   | gagccccctatagggtagg    |
|               | <i>RBM28</i>         | cctaccaaagccagcgttc    | gtccggccttttcagtcac    |
|               | <i>RMRP</i>          | acgtagacattcccgcctc    | acgcactgcctcgtaacta    |
| <i>RPL11</i>  | caggttcagcatcgagac   | cgggaaattattgcccagga   |                        |
| <i>RPL35A</i> | aaggccattttgtggcta   | gaaccatgccactgttcca    |                        |
| <i>RPL36</i>  | caacaagggccacaaagtga | gggaggggctcagctttct    |                        |
| <i>RPL5</i>   | cgaaacgcttggatgataca | gtcacctccacttggccttc   |                        |
| <i>RPS14</i>  | tgtgactggtggatgaagg  | ggtgataccagctcctgctc   |                        |
| <i>RPS15</i>  | agaagccggaagtgtgaag  | atggagaactgcccaggta    |                        |

|               |                    |                         |                         |
|---------------|--------------------|-------------------------|-------------------------|
|               | <i>RPS17</i>       | gccattatcccagcaaaaa     | gccattatcccagcaaaaa     |
|               | <i>RPS19</i>       | acgaacttcgccctgagag     | gggagcaagctctttgtgct    |
|               | <i>RPS24</i>       | tttggtggtggcaagacaac    | ttgcagtccccctgacttt     |
|               | <i>RPS27A</i>      | cattgggtggtgcgctaa      | ctcaggggtgatggcttcc     |
|               | <i>RPS7</i>        | tcccaggagaaagccatggt    | ctccagaagagcctgggaga    |
|               | <i>SBDS</i>        | gacgctgctgaagctagt      | taccacggccacattggta     |
|               | <i>TCOF1</i>       | tgagctgctggaacaggaaa    | ccttgaagtcgtggaggtc     |
|               | <i>UTP14C</i>      | aaagcccagtgccaagaaaa    | aggggtctggatggctctt     |
|               | <i>WDR36</i>       | caaggaagcctgcagtgtg     | aatatggccacatgggcttc    |
|               | <i>NOP10</i>       | ctcgttctcccagatgac      | agggtcacagtcggaagag     |
|               | <i>WDR12</i>       | tggctcagctcacaacacgct   | ggcaattcagaggcagcagggga |
|               | <i>PES1</i>        | gggcacctacgcgttgact     | tccacctcggcctcctctc     |
|               | <i>28S</i>         | agaggtaaacgggtgggtc     | ggggcgggagggaacgg       |
|               | <i>U1</i>          | ccatgatcacgaaggtggtt    | atgcagtcgagttcccacat    |
|               | <i>SP6</i>         | catacgatttagtgacactatag |                         |
|               | <i>MF18</i>        | tacgatacaaggctgttagagag |                         |
|               | <i>MF19</i>        | cgaaccgcaaggaaccttc     |                         |
|               |                    |                         |                         |
| <b>shRNAs</b> | <b>Gene symbol</b> | <b>Clone ID</b>         | <b>Catalog number</b>   |
|               | <i>BOP1</i>        | TRCN0000078069          | RHS3979-97066366        |
|               |                    | TRCN0000078071          | RHS3979-97066368        |
|               | <i>HAT1</i>        | TRCN0000034735          | RHS3979-9602143         |
|               |                    | TRCN0000034737          | RHS3979-9602145         |
|               | <i>KDM4C</i>       | TRCN0000022056          | RHS3979-9589464         |
|               |                    | TRCN0000022058          | RHS3979-9589466         |
|               | <i>HMGB1</i>       | TRCN0000018932          | RHS3979-9586254         |
|               |                    | TRCN0000018934          | RHS3979-9586256         |
|               | <i>HMG1</i>        | TRCN0000019059          | RHS3979-9586467         |
|               |                    | TRCN0000019060          | RHS3979-9586468         |
|               | <i>ING5</i>        | TRCN0000020090          | RHS3979-9587498         |
|               |                    | TRCN0000020092          | RHS3979-9587500         |
|               | <i>DUSP4</i>       | TRCN0000006842          | RHS3979-9575763         |
|               |                    | TRCN0000006843          | RHS3979-9575764         |
|               | <i>DUSP6</i>       | TRCN0000002437          | RHS3979-9571003         |
|               |                    | TRCN0000010706          | RHS3979-9571004         |
|               | <i>RPL11</i>       | TRCN0000117714          | RHS3979-98059637        |
|               |                    | TRCN0000117716          | RHS3979-98059653        |
|               | <i>RPS24</i>       | TRCN0000117547          | RHS3979-98059466        |
|               |                    | TRCN0000117548          | RHS3979-98059474        |
|               | <i>WDR12</i>       | V3LHS_311782            | RHS4430-101164454       |
|               |                    | V2LHS_156548            | RHS4430-99613637        |
|               | <i>PES1</i>        | V3LHS_304461            | RHS4430-101034784       |
|               |                    | V3LHS_304460            | RHS4430-101031539       |
|               |                    |                         |                         |

|                            | <b>Protein symbol</b>   | <b>Antibody source</b>               | <b>Dilution</b> |
|----------------------------|-------------------------|--------------------------------------|-----------------|
| <b>Immunoblotting</b>      | Actin                   | Cell signaling                       | 1:5000          |
|                            | KDM4C                   | Active Motif                         | 1:1000          |
|                            | HMGB1                   | Cell signaling                       | 1:2000          |
|                            | ING5                    | Santa Cruz Biotechnology             | 1:200           |
|                            | HAT1                    | Santa Cruz Biotechnology             | 1:200           |
|                            | P-ERK1/2                | Cell signaling                       | 1:2000          |
|                            | T-ERK1/2                | Cell signaling                       | 1:2000          |
|                            | DUSP4                   | Cell signaling                       | 1:2000          |
|                            | BOP1                    | Santa Cruz Biotechnology             | 1:200           |
|                            | V5                      | Cell signaling                       | 1:2000          |
|                            | RPL11                   | Cell signaling                       | 1:2000          |
|                            | RPS24                   | Thermofischer scientific             | 1:1000          |
|                            | TP53                    | Santa Cruz Biotechnology             | 1:200           |
|                            | HMG1                    | Active Motif                         | 1:1000          |
| <b>Immuno-fluorescence</b> | GM113                   | BD Biosciences                       | 1:200           |
|                            | BOP1                    | Sigma Aldrich                        | 1:250           |
|                            | S100                    | Biogenex Laboratories                | 1:100           |
|                            | HMB45                   | Biogenex Laboratories                | 1:100           |
|                            | Alexaflour546           | Invitrogen                           | 1:100           |
|                            | Cy5-Thyramide           | Perkin Elmer                         | 1:50            |
|                            |                         |                                      |                 |
| <b>Inhibitors</b>          |                         | <b>Concentration</b>                 | <b>Source</b>   |
|                            | Vemurafenib             | 0.1 $\mu$ M, 1 $\mu$ M and 2 $\mu$ M | Selleckchem     |
|                            | Dabrafenib              | 50 nM and 100 nM                     | Selleckchem     |
|                            |                         |                                      |                 |
| <b>cDNA/ORF</b>            | <b>Accession number</b> | <b>Clone ID</b>                      | <b>Source</b>   |
| DUSP4                      | BC002671                | ccsbBroad304_06130                   | Dharmacon       |
| DUSP6                      | BC037236                | ccsbBroad304_00468                   | Dharmacon       |
